# 1           **Structural insights for neutralization of BA.1 and BA.2 Omicron** 2           **variants by a broadly neutralizing SARS-CoV-2 antibody**

3 Sanjeev Kumar<sup>1†</sup>, Anamika Patel<sup>2†</sup>, Lilin Lai<sup>3</sup>, Chennareddy Chakravarthy<sup>4,5</sup>, Rajesh  
4 Valanparambil<sup>4,5</sup>, Meredith E. Davis-Gardner<sup>3</sup>, Venkata Viswanadh Edara<sup>3</sup>, Susanne  
5 Linderman<sup>4,5</sup>, Elluri Seetharami Reddy<sup>1,6</sup>, Kamalvishnu Gottimukkala<sup>1</sup>, Kaustuv  
6 Nayak<sup>1</sup>, Prashant Bajpai<sup>1</sup>, Vanshika Singh<sup>1</sup>, Filipp Frank<sup>2</sup>, Narayanaiah Cheedarla<sup>7</sup>, Hans  
7 P. Verkerke<sup>7,8</sup>, Andrew S. Neish<sup>7</sup>, John D. Roback<sup>7</sup>, Grace Mantus<sup>3,5</sup>, Pawan Kumar Goel<sup>9</sup>,  
8 Manju Rahi<sup>10</sup>, Carl W. Davis<sup>4,5</sup>, Jens Wrammert<sup>3,5</sup>, Mehul S. Suthar<sup>3</sup>, Rafi Ahmed<sup>4,5</sup>, Eric  
9 Ortlund<sup>2,\*</sup>, Amit Sharma<sup>11,12,\*</sup>, Kaja Murali-Krishna<sup>1,3,5,\*</sup>, Anmol Chandele<sup>1,\*</sup>

10 <sup>1</sup>ICGEB-Emory Vaccine Center, International Center for Genetic Engineering and  
11 Biotechnology, New Delhi, 110067, India

12 <sup>2</sup>Department of Biochemistry, Emory University School of Medicine, Atlanta, GA 30322,  
13 USA.

14 <sup>3</sup>Department of Pediatrics, Emory University School of Medicine, Emory University,  
15 Atlanta, GA 30322, USA

16 <sup>4</sup>Department of Microbiology and Immunology, Emory University School of Medicine,  
17 Emory University, Atlanta, GA 30322, USA

18 <sup>5</sup>Emory Vaccine Center, Emory University, Atlanta, GA 30322, USA

19 <sup>6</sup>Kusuma School of Biological Sciences, Indian Institute of Technology, New Delhi,  
20 110016, India

21 <sup>7</sup>Department of Pathology and Laboratory Medicine, Emory University School of  
22 Medicine, Atlanta, GA 30322, USA

23 <sup>8</sup>Department of Pathology, Brigham and Women's Hospital, Boston, MA, USA

24 <sup>9</sup>Shaheed Hasan Khan Mewat Government Medical College, Haryana, India

25 <sup>10</sup>Division of Epidemiology and Communicable Diseases, Indian Council of Medical  
26 Research, New Delhi, 110029, India

27 <sup>11</sup>ICMR-National Institute of Malaria Research, Dwarka, New Delhi, 110077, India

28 <sup>12</sup>Structural Parasitology Group, International Center for Genetic Engineering and  
29 Biotechnology, New Delhi, 110067, India

30 †These authors contributed equally to this work

31 \*Corresponding authors

32 Anmol Chandele: [chandeleanmol@gmail.com](mailto:chandeleanmol@gmail.com); [anmol@icgeb.res.in](mailto:anmol@icgeb.res.in)

33 Kaja Murali-Krishna: [murali.kaja@emory.edu](mailto:murali.kaja@emory.edu)

34 Amit Sharma: [directornimr@gmail.com](mailto:directornimr@gmail.com)

35 Eric Ortlund: [eortlun@emory.edu](mailto:eortlun@emory.edu)

## 36 **Keywords**

37 SARS-CoV-2, COVID-19, Omicron, BA.1, BA.2, human monoclonal antibodies, broadly  
38 neutralizing antibodies, CryoEM structure, variants of concern

39 **Short Title**

40 *A broadly neutralizing human monoclonal antibody to the SARS-CoV-2 Omicron variant.*

41 **Abstract**

42 The SARS-CoV-2 BA.1 and BA.2 (Omicron) variants contain more than 30 mutations  
43 within the spike protein and evade therapeutic monoclonal antibodies (mAbs). Here, we  
44 report a receptor-binding domain (RBD) targeting human antibody (002-S21F2) that  
45 effectively neutralizes live viral isolates of SARS-CoV-2 variants of concern (VOCs)  
46 including Alpha, Beta, Gamma, Delta, and Omicron (BA.1 and BA.2) with IC<sub>50</sub> ranging from  
47 0.02 – 0.05 µg/ml. This near germline antibody 002-S21F2 has unique genetic features  
48 that are distinct from any reported SARS-CoV-2 mAbs. Structural studies of the full-length  
49 IgG in complex with spike trimers (Omicron and WA.1) reveal that 002-S21F2 recognizes  
50 an epitope on the outer face of RBD (class-3 surface), outside the ACE2 binding motif and  
51 its unique molecular features enable it to overcome mutations found in the Omicron  
52 variants. The discovery and comprehensive structural analysis of 002-S21F2 provide  
53 valuable insight for broad and potent neutralization of SARS-CoV-2 Omicron variants  
54 BA.1 and BA.2.

55 **Main Text**

56 The ongoing Coronavirus disease 2019 (COVID-19) pandemic caused by severe acute  
57 respiratory syndrome coronavirus 2 (SARS-CoV-2) has resulted in roughly 517 million  
58 cases and 6 million deaths worldwide (1). Intense global efforts are being pursued to  
59 develop, evaluate, and implement vaccines or other medical countermeasures, including  
60 monoclonal antibody (mAb) therapy (2, 3). Widespread transmission and key mutations  
61 have led to the emergence of viral variants that escape neutralization by therapeutic  
62 antibodies as well as natural and vaccine acquired immunity (4-8). Most therapeutic  
63 mAbs currently licensed for use against SARS-CoV-2 have shown reduced neutralizing  
64 activity against the Omicron (B.1.1.529) variant and its sublineages (7-9). This highlights  
65 a continuous need to identify mAbs that are effective against emerging variants.

66 Like other human coronaviruses, the spike protein of SARS-CoV-2 facilitates the entry of  
67 virus into host cells and comprises two subunits, S1 and S2 (10). The receptor-binding

68 motif (RBM), a region of the receptor-binding domain (RBD) present in the S1 subunit,  
69 interacts with the host cell receptor angiotensin-converting enzyme 2 (ACE2) whereas  
70 the S2 subunit is involved in the fusion of the viral and host cell membranes (10). Based  
71 on their epitopes, two classification schemes have been proposed to divide RBD-specific  
72 mAbs into either four (class 1-4) or seven (RBD1-7) categories (3, 11, 12). An  
73 unprecedented number of mutations (>10) in the RBM of Omicron and its sublineages  
74 contribute to resistance to currently available therapeutic mAbs (6, 7, 9, 13).

75 We previously evaluated the humoral immune responses in 42 COVID-19-recovered  
76 individuals who had experienced mild symptoms after the ancestral Wuhan strain  
77 (WA.1) transmission in the year 2020 (14). We selected five individuals (**Table S1**) who  
78 had high SARS-CoV-2 RBD binding titers, high neutralization titers to live SARS-CoV-2  
79 WA.1, and had detectable frequencies of RBD specific memory B cells (**Fig. S1A, S1B and**  
80 **S1C**) for the generation of SARS-CoV-2 RBD-specific mAbs. In total, we sorted 804 SARS-  
81 CoV-2 RBD fluorescent probe binding class-switched B cells, amplified 398 (~50%)  
82 paired heavy- and light-chain antibody gene sequences, and successfully cloned and  
83 expressed 208 antibodies (**Fig. 1A**). RBD-based ELISA screening resulted in the  
84 identification of 92 SARS-CoV-2 specific mAbs (**Fig. S1D**). These mAbs showed an average  
85 CDR3 length of 16.3 amino acids, which is typical of a human IgG repertoire (15) (**Fig.**  
86 **S1E**), as well as enriched usage of heavy and light chain variable region genes belonging  
87 to the IGHV3, IGKV1, and IGLV1 families (**Fig S1F**). Most of these mAbs had a low  
88 frequency of somatic hypermutations (SHM) in both their heavy and light chains  
89 suggesting they were recently recruited from a naive B cell pool (**Fig. S1G**). Of these  
90 mAbs, 48 blocked the ACE2-RBD interaction (**Fig. S2A**) and 18 (37.5%) successfully  
91 neutralized live virus with IC<sub>50</sub> values ranging from 0.05 – 17 µg/ml (**Fig. S2B**). Antibody  
92 002-S21F2 was the most potent amongst all the mAb that neutralized live SARS-CoV-2  
93 WA.1 and thus was selected for comprehensive downstream characterization.

94 Binding analysis assessed by an electrochemiluminescence multiplex assay (Meso Scale  
95 Discovery) revealed that 002-S21F2 bound with similar affinities to all tested SARS-CoV-  
96 2 variant spike proteins including WA.1, Alpha (B.1.1.7), Beta (B.1.351), Gamma (P.1),  
97 Delta (B.1.617.2) and Omicron (B.1.1.529) (**Fig. 1B and 1D**). Furthermore, 002-S21F2  
98 bound with picomolar affinity to the prefusion-stabilized WA.1 spike (spike-6p) by  
99 biolayer interferometry (**Fig. S3A and S3B**). Interestingly, antibody 002-S21F2 was

100 capable of broadly neutralizing the Alpha, Beta, Gamma, Delta, BA.1 and BA.2 variants  
101 with a 50% inhibitory concentration (IC<sub>50</sub>) values of 0.05, 0.02, 0.03, 0.03, 0.05 and 0.04  
102 µg/ml respectively (**Fig. 1C and 1D**).

103 To define the molecular features conferring epitope recognition and to understand the  
104 mechanism of the broad neutralization spectrum of 002-S21F2 against SARS-CoV-2  
105 variants, we determined the cryoEM structures of 002-S21F2 full-length immunoglobulin  
106 G (IgG) in complex with WA.1 and Omicron spike-6P at 3.7 Å and 4.1 Å, respectively (**Fig.**  
107 **2, S5 and S6**). The cryoEM structure showed that 002-S21F2 binds to the outer face of  
108 the RBD which is accessible in both “down” and “up” conformations and is outside the  
109 ACE2 binding motif (**Fig. 2B-C**). The interaction buried a total surface area of ~737 Å<sup>2</sup>  
110 with heavy and light chains contributing ~60% and ~40% of the total interaction,  
111 respectively (**Fig. 2C**). Most of the interactions are mediated through the heavy and light-  
112 chain CDR3 regions and the epitope aligns with RBD-5/class-3 antibodies (11, 12). RBD  
113 residue R346 is the main contact point and is sandwiched between the heavy chain CDR3  
114 and light chain CDR1 and CDR3 regions. Specifically, the guanidine group of R346 engages  
115 in multiple hydrogen bonds involving T102 and Y91 from the heavy and light chain CDR3,  
116 respectively (**Fig. 2C**), and has the potential for a cation-π stacking interaction involving  
117 Y32 from light chain CDR1. The T102 hydroxyl in the CDR3 heavy chain also hydrogen  
118 bonds with the RBD N448 side chain (**Fig. 2F**). The other major interaction site involves  
119 RBD residue N440, which engages in multiple interactions with W33 from CDR1 and Y52  
120 from the heavy chain CDR2 (**Fig. 2E**). In addition, the side chain of T345 in the RBD  
121 hydrogen bonds with the main chain carbonyl of K92 in the light chain CDR3 (**Fig.**  
122 **2D**). Most variants of concern (VOCs), with the exception of Omicron, do not contain any  
123 mutations within the 002-S21F2 epitope, explaining its broad neutralization ability (**Fig.**  
124 **1C and Fig. 2I**). Both BA.1 and BA.2 Omicron variants contain glycine 339 to aspartic acid  
125 (G339D) and asparagine 440 to lysine (N440K) mutations within the 002-S21F2 epitope.  
126 However, the Omicron spike 002-S21F2 structure reveals identical binding compared to  
127 WA.1 and the two structures align with overall Cα-backbone RMSD of 0.975 Å and 0.875  
128 Å in the RBD-Fab region (**Fig. S7**). All 002-S21F2 interactions observed in WA.1 remain  
129 conserved in Omicron. Furthermore, the side chain of K440 in Omicron-RBD makes an  
130 additional hydrogen bond with D57 in the heavy chain CDR2 (**Fig. 2G**), explaining why  
131 this change has minimal impact on affinity and neutralization (**Fig. 1B-D**).

132 The antigenic residues targeted by 002-S21F2 broadly neutralizing antibody (bnAb) are  
133 highly conserved among current and previous SARS-CoV-2 VOC (**Fig. 2K and S8, S9A**).  
134 Our structural data shows that 002-S21F2 continues to maintain potent neutralization  
135 against Omicron variants BA.1 and BA.2 which harbor epitope mutations at G339D and  
136 N440K (**Fig. 1C, 1D, 2G and S7**). We suspect that this neutralization ability will persist  
137 with newly listed variants (BA.2.13, BA.2.12.1, BA.3 and BA.4/BA.5), as they are not  
138 reported to contain any additional mutations within the 002-S21F2 epitope region (**Fig.**  
139 **S8**). Furthermore, sequence alignment of Sarbecovirus RBDs shows 10 out of 19  
140 conserved residues in SARS-CoV suggesting potential for cross-reactivity with other  
141 Sarbecoviruses (**Fig. 2K and Fig. S9B**).

142 Structural comparison of the 002-S21F2 epitope with other class-3 mAbs, including the  
143 two available therapeutic mAbs effective against Omicron - Ly-CoV1404 (Bebtelovimab)  
144 and S309 (Sotrovimab), show some similarities between the 002-S21F2 and C135  
145 binding sites (**Fig. 2J**) (16, 17). However, C135 is unable to neutralize Omicron as a lysine  
146 mutation at RBD site N440 position would sterically clash with the C135 heavy chain  
147 CDR2 (**Fig. 2J**) (18). In support of this, RBD deep mutational scanning shows that an  
148 N440K mutation (present in BA.1 and BA.2) disrupts the RBD-C135 interaction (19).

149 Although 002-S21F2 recognizes an epitope outside the ACE2 binding motif, it may  
150 directly block ACE2 interaction through head-to-head inter-spike crosslinking as  
151 observed at saturating spike to IgG concentration (**Fig. S5C**). This corroborates a recent  
152 report that positively correlates high neutralization potency to inter-spike crosslinking  
153 ability within the RBD-5/class-3 antibodies (11). Interestingly, we also observed a higher  
154 ratio of all RBD “down” conformations (~54% particles) in antibody bound spike data  
155 compared to apo spike-6P (which only shows ~35% of all RBD “down” conformation  
156 particles). Both putative mechanisms may interfere with the ACE2 binding and  
157 contribute to neutralization.

158 Sequence analysis of 002-S21F2 revealed that its heavy chain (HC) variable region is  
159 comprised from VH5-51, DH5-24, and JH4 genes; the light chain (LC) gene utilizes VK1-  
160 33 and JK2 (**Fig. S4A**). Of the 5252 SARS-CoV-2 mAb sequences banked in the CoV-AbDab  
161 database (20), only 2 others utilized this combination of VH5-51 and VK1-33 (**Fig. S4B**).  
162 Alignment of the 002-S21F2 mAb sequence to its germline sequence revealed 4 amino

163 acid (AA) mutations in the HC that spanned the FR1 and CDR1 regions, and 3 AA  
164 mutations present in the FR3 and CDR3 regions of the LC (**Fig. S4C**). This low frequency  
165 of somatic hypermutations (SHM), 2.7% in the HC and 1.7% in the LC, suggests that the  
166 memory B cell that expressed this mAb had not yet undergone extensive selection in the  
167 germinal center. A comparison of 002-S21F2 with SARS-CoV-2 therapeutic mAbs  
168 approved for clinical use revealed no obvious genetic similarities, suggesting that 002-  
169 S21F2 exhibits unique genetic characteristics (**Fig. 3A**).

170 Structural studies have reported that SARS-CoV-2 bnAbs target only a few antigenic sites  
171 on the RBD which are majorly recognized by class-3 and class-4 mAbs (11, 12, 17, 18).  
172 Omicron and its sublineages can evade natural and vaccine generated immunity and pose  
173 a threat to immune-compromised, vaccine-hesitant and unvaccinated adults and  
174 children. However, only 2 of the currently approved therapeutic antibodies have shown  
175 neutralization potential to Omicron – an S309 derivative (Sotrovimab) and Ly-CoV1404  
176 (Bebtelovimab). We show that 002-S21F2 potently neutralizes both Omicron BA.1 and  
177 BA.2 and previous VOC without sacrificing potency, similar to a recently reported mAb  
178 Bebtelovimab (16). In contrast, Sotrovimab neutralized BA.1 with ~3-fold higher potency  
179 (than WA.1) yet poorly neutralizes BA.2 (9). Both of these bnAbs are class-3 antibodies  
180 that recognize overlapping epitopes on the outer face of RBD but are distinct from the  
181 002-S21F2 epitope (**Fig. 3B**). This suggests that the epitopes defined by the SARS-CoV-2  
182 class-3 bnAbs target distinct antigenic residues on the outer face of the RBD, and that this  
183 surface may potentially form the basis for an effective vaccine. For example, selective  
184 steering of B cell immune responses to the RBD class-3 antigenic sites, defined by 002-  
185 S21F2 and Bebtelovimab bnAbs, may induce potent antibody responses against SARS-  
186 CoV-2 VOC. A similar successful strategy of epitope-focused vaccine candidates has been  
187 previously used to guide induction of HIV-1 bnAbs VRC01 and PGT121 that are currently  
188 in clinical trials (21-23). In addition, 002-S21F2 maintains potent neutralization to  
189 Omicron variants despite being isolated from a convalescent individual infected in the  
190 early months of the pandemic, when only the ancestral SARS-CoV-2 WA.1 strain was  
191 reported. Further, our structural analysis shows that the limited number of SHMs  
192 observed in this near germline bnAb 002-S21F2 are not involved in recognizing the  
193 antigenic sites (**Fig. 2**), further indicating that footprints of such bnAbs may provide a  
194 template to guide rational vaccine design.

195 The structural and genetic analysis of 002-S21F2 bnAb shows that it is distinct from the  
196 previously reported SARS-CoV-2 mAbs. The cryoEM structures of 002-S21F2 IgG with  
197 both WA.1 and Omicron provide a mechanistic rationale for its resilience against Omicron  
198 (BA.1 and BA.2) possibly owing to unique molecular signatures that target a non-ACE2  
199 binding conserved RBD epitope. 002-S21F2 bnAb has tremendous potential to treat  
200 COVID-19 patients. Taken together, the discovery and structural analysis of the bnAb  
201 002-S21F2 provides valuable insights into immune mechanisms permitting potent  
202 neutralization of highly transmissible and immune evasive Omicron VOC.

### 203 **Acknowledgements**

204 We are thankful to Mr Satendra Singh and Mr Ajay Singh, ICGEB, New Delhi for technical  
205 support; Dr Vinay Gupta, BD Biosciences India and Aditya Rathee, ICGEB-TACF facility for  
206 single-cell sorting; Dr Vineet Menachery and Dr Pei-Yong Shi for providing the SARS-CoV-  
207 2mNG for the neutralization assays; Dr Jason McLellan for providing the SARS-CoV-2  
208 hexapro spike expression plasmid. The cryoEM data sets on Talos Arctica were collected  
209 at Robert P. Apkarian Integrated Electron Microscopy Core (IEMC) at Emory University,  
210 Atlanta. We thank IEMC staff members for their support in data collection.

### 211 **Funding**

212 This research was supported by the Indian Council of Medical Research VIR/COVID-  
213 19/02/2020/ECD-1 (A.C.). S.K. is supported through DBT/Wellcome Trust India Alliance  
214 Early Career Fellowship grant IA/E/18/1/504307 (S.K.). Both K.N. and E.S.R. are  
215 supported through Dengue Translational Research Consortia National Biopharma  
216 Mission BT/NBM099/02/18 (A.C.). K.G. was supported through DBT grant  
217 BT/PR30260/MED/15/194/2018 (A.C, K.M). C.W.D. is supported through the National  
218 Institute of Allergy and Infectious Diseases (NIAID) U19 AI142790, Consortium for  
219 Immunotherapeutics against Emerging Viral Threats. Work done in M.S.S. lab was funded  
220 in part with Federal funds from the National Institute of Allergy and Infectious Diseases,  
221 National Institutes of Health, Department of Health and Human Services, under  
222 HHSN272201400004C (NIAID Centers of Excellence for Influenza Research and  
223 Surveillance, CEIRS) and NIH P51 OD011132 to Emory University. This work was also  
224 supported in part by the Emory Executive Vice President for Health Affairs Synergy Fund  
225 award, COVID-Catalyst-I3 Funds from the Woodruff Health Sciences Center and Emory

226 School of Medicine, the Pediatric Research Alliance Center for Childhood Infections and  
227 Vaccines and Children's Healthcare of Atlanta, and Woodruff Health Sciences Center 2020  
228 COVID-19 CURE Award.

### 229 **Author contributions**

230 Experimental work, data acquisition and analysis of data by S.K., A.P., L.L., C.R.C., R.V.,  
231 M.E.D.G., V.V.E., S.L., E.S.R., K.V.G., K.N., P.B., V.S., F.F., N.C., H.V., A.S.N., J.D.R., G.M., P.K.G.,  
232 M.R., C.W.D., J.W., and E.O. Conceptualization and implementation by S.K., A.P., E.O., M.S.S.,  
233 A.S., R.A., M.K.K., A.C. Manuscript writing by S.K., A.P., E.O., A.C., All authors contributed to  
234 reviewing and editing the manuscript.

### 235 **Competing interests**

236 The International Centre for Genetic Engineering and Biotechnology, New Delhi, India,  
237 Emory Vaccine Center, Emory University, Atlanta, USA, Indian Council of Medical  
238 Research, India and Department of Biotechnology, India have filed a provisional patent  
239 application on human monoclonal antibodies mentioned in this study on which A.C., S.K.,  
240 M.K.K., and A.S. are inventors (Indian patent 202111052088). M.S.S. serves on the  
241 advisory board for Moderna and Ocugen. All other authors declare no competing  
242 interests.

### 243 **Data and materials availability**

244 Atomic coordinates and cryoEM maps for reported structures are deposited into the  
245 Protein Data Bank (PDB) and the Electron Microscopy Data Bank (EMDB) with accession  
246 codes PDB-7U0P and EMD-26262 for WA.1 Spike-6P in complex with mAb 002-S21F2  
247 and PDB-7UPL and EMD-26669 for Omicron Spike-6P in complex with mAb 002-S21F2.  
248 Immunoglobulin sequences are available in GenBank under accession numbers XX. Any  
249 additional data are available upon reasonable request from the corresponding authors.  
250 Source data are provided in this paper.



## 251 **Materials and Methods**

### 252 **Human subjects**

253 COVID-19 recovered individuals have been described earlier (14). Of these, five subjects  
254 chosen based on the frequency of receptor binding protein-positive memory B cells and  
255 the available number of banked peripheral blood mononuclear cells (PBMCs) were  
256 included in this study for human monoclonal antibodies generation.

### 257 **SARS-CoV-2 RBD-specific ELISA binding assays**

258 The recombinant SARS-CoV-2 RBD gene was cloned, expressed, purified and ELISAs were  
259 performed as previously described (24). Briefly, purified RBD was coated on MaxiSorp  
260 plates (Thermo Fisher, #439454) at a concentration of 1 µg/mL in phosphate-buffered  
261 saline (PBS) at 4°C overnight. The plates were washed extensively with PBS containing  
262 0.05% Tween-20. Three-fold serially diluted plasma or purified mAb was added to the  
263 plates and incubated at room temperature for 1 hr. After incubation, the plates were  
264 washed and the SARS-CoV-2 RBD specific IgG, IgM, IgA signals were detected by  
265 incubating with horseradish peroxidase (HRP) conjugated - anti-human IgG (Jackson  
266 ImmunoResearch Labs, #109-036-098), IgM (Jackson ImmunoResearch Labs, #109-036-  
267 129), or IgA (Jackson ImmunoResearch Labs, #109-036-011). Plates were then washed  
268 thoroughly and developed with o-phenylenediamine (OPD) substrate (Sigma, #P8787)  
269 in 0.05M phosphate-citrate buffer (Sigma, #P4809) pH 5.0, containing 0.012% hydrogen  
270 peroxide (Fisher Scientific, #18755). Absorbance was measured at 490 nm.

### 271 **Authentic live SARS-CoV-2 neutralization assay**

272 Neutralization titers to SARS-CoV-2 were determined as previously described (14, 24).  
273 Briefly, 100 pfu of SARS-CoV-2 (2019-nCoV/USA\_WA1/2020), Alpha, Beta, Gamma, Delta  
274 and Omicron (BA.1 and BA.2) were used on Vero TMPRSS2 cells. Heat-inactivated serum  
275 (only for WT) or purified monoclonal was serially diluted three-fold in duplicate starting  
276 at a 1:20 dilution or 10 µg/ml respectively in a 96-well round-bottom plate and incubated  
277 for 1 h at 37°C. This antibody-virus mixture was transferred into the wells of a 96-well  
278 plate that had been seeded with Vero-TMPRSS2 cells the previous day at a concentration  
279 of  $2.5 \times 10^4$  cells/well. After 1 hour, the antibody-virus inoculum was removed and 0.85%

280 methylcellulose in 2% FBS containing DMEM was overlaid onto the cell monolayer. Cells  
281 were incubated at 37°C for 16-40 hours. Cells were washed three times with 1X PBS  
282 (Corning Cellgro) and fixed with 125 µl of 2% paraformaldehyde in PBS (Electron  
283 Microscopy Sciences) for 30 minutes. Following fixation, plates were washed twice with  
284 PBS and 100 µl of permeabilization buffer, was added to the fixed cells for 20 minutes.  
285 Cells were incubated with an anti-SARS-CoV spike primary antibody directly conjugated  
286 with alexaflour-647 (CR3022-AF647) for up to 4 hours at room temperature.

287 Plates were then washed twice with 1x PBS and imaged on an ELISPOT reader (CTL  
288 Analyzer). Foci were counted using Viridot (counted first under the “green light” set  
289 followed by background subtraction under the “red light” setting). IC<sub>50</sub> titers were  
290 calculated by non-linear regression analysis using the 4PL sigmoidal dose curve equation  
291 on Prism 9 (Graphpad Software). Neutralization titers were calculated as 100% x [1-  
292 (average foci in duplicate wells incubated with the specimen) ÷ (average number of foci  
293 in the duplicate wells incubated at the highest dilution of the respective specimen)].

#### 294 **SARS-CoV-2 RBD specific memory B cell staining and single-cell sorting**

295 Purified SARS-CoV-2 RBD protein was labelled with Alexa Fluor 488 using a microscale  
296 protein labelling kit (Life Technologies, #A30006) as per the manufacturer’s protocol.  
297 Ten million PBMCs of select COVID-19 recovered donors were stained with RBD-Alexa  
298 Fluor 488 for 1 hour at 4°C, followed by washing with PBS containing 2% FBS (FACS  
299 buffer) and incubation with efluor780 Fixable Viability (Live Dead) dye (Life  
300 Technologies, #65-0865-14) and anti-human CD3, CD19, CD20, CD27, CD38 and IgD  
301 antibodies (BD Biosciences) for 30 minutes. Cells were washed twice with FACS buffer  
302 and acquired on BD FACS ARIA Fusion (BD Biosciences). Live IgD negative B cells that  
303 were positive for the SARS-CoV-2 RBD-Alexa Fluor 488 protein were single cell sorted  
304 into a 96-well plate containing 5 µl of lysis buffer. The lysis buffer consisted of 20 U of  
305 RNase inhibitor (Promega), in 10 mM Tris pH 8.0 buffer. The plates with the sorted single  
306 cells were centrifuged gently at 2000 rpm at 4°C and stored immediately at -80°C for at  
307 least 1 hr before performing the cDNA synthesis. Data were analyzed using FlowJo  
308 software 10.

#### 309 **Antibody genes amplification and cloning**

310 The antibody genes were amplified as described earlier (25, 26). Briefly, cDNA was  
311 synthesized, and antibody variable gene VDJ segments were amplified by reverse  
312 transcription-polymerase chain reaction (RT-PCR) using a template-switching rapid  
313 amplification of complementary DNA (cDNA) ends (RACE) approach (Davis et al.,  
314 manuscript in preparation). Gene segments were cloned into AbVec6W vectors (25). 4  
315 colonies from each transformed plate were randomly picked and the insert was checked  
316 by performing colony PCR using nested PCR primers. The sequence integrity of the  
317 plasmids was verified by Sanger sequencing (Macrogen sequencing, South Korea).

### 318 **Immunogenetic analyses of antibody genes**

319 The immunogenetic analysis of both heavy chain and light chain germline assignment,  
320 framework region annotation, determination of somatic hypermutation (SHM) levels  
321 (nucleotides) and CDR loop lengths (amino acids) was performed with the aid of  
322 IMGT/HighV-QUEST ([www.imgt.org/HighV-QUEST](http://www.imgt.org/HighV-QUEST)) (27).

### 323 **Expression of human monoclonal antibodies**

324 For small-scale transfection, expi293F cells were maintained in 293 expression medium  
325 and transfected at a density of 2.5 million cells per/ml in a volume of 4 ml culture per  
326 well of a 6-well cell culture plate (Corning). The transfection mix consisted of a 1:1.5  
327 HC/LC ratio using a 1:3 ratio with 1 mg/ml PEI-Max transfection reagent (Polysciences)  
328 in 200  $\mu$ l Opti-MEM. After 15-minute incubation at RT, the transfection mix was added to  
329 the cells. Supernatants were harvested 4-5 days post-transfection and clarified  
330 supernatants were tested for their SARS-CoV-2 RBD binding potential by enzyme-linked  
331 immunosorbent assay (ELISA). Supernatant with positive RBD binding signals was next  
332 purified using Protein A/G beads (Thermo Scientific), concentrated using a 30 kDa or 100  
333 kDa cut-off concentrator (Vivaspin, Sartorius) and stored at 4°C for further use.

### 334 **SARS-CoV-2 surrogate virus neutralization test (sVNT)**

335 The potential of human ACE2 and SARS-CoV-2 RBD interaction inhibition by RBD-specific  
336 mAbs was measured with the cPass SARS-CoV-2 surrogate virus neutralization test  
337 (sVNT) kit (Genscript, Singapore) as described previously (28), as per the manufacturer's  
338 protocol. Briefly, each mAb at 20  $\mu$ g/ml concentration was mixed with equal volumes of

339 recombinant HRP-conjugated RBD and incubated for 30 min at 37°C. Next, 100 µl of this  
340 mixture was transferred to 96-well plates coated with recombinant hACE2 receptor and  
341 further incubated for 15 min at 37°C. The plate was washed four times with 1X PBST  
342 buffer followed by the addition of tetramethylbenzidine (TMB) substrate). The plate was  
343 incubated for 15 min at room temperature, and the reaction was stopped by adding the  
344 stop solution. Absorbance was measured at 450 nm and the percentage of inhibition of  
345 each sample was calculated using the following formula: % inhibition = (1 - (OD450  
346 sample/ OD450 of negative control)) x 100. Controls were included in duplicate; samples  
347 were analyzed in the singular. Inhibition >30% was regarded as a positive neutralization.

### 348 **Electrochemiluminescence antibody binding assay**

349 Binding analysis of SARS-CoV-2 mAb to spike protein was performed using an  
350 electrochemiluminescence assay as previously described (29). V-PLEX COVID-19 Panel  
351 24 (Meso Scale Discovery) was used to measure the IgG1 mAb binding to SARS-CoV-2  
352 spike antigens following the manufacturer's recommendations. Briefly, antigen coated  
353 plates were blocked with 150 µl/well of 5% BSA in PBS for 30 minutes. Plates were  
354 washed three times with 150 µl/well of PBS with 0.05% Tween between each incubation  
355 step. mAbs were serially diluted for concentrations ranging from 10 µg/ml to 0.1 pg/ml  
356 and 50 µl/well were added to the plate and incubated for two hours at room temperature  
357 with shaking at 700rpm. mAb antibody binding was then detected with 50 µl/well of MSD  
358 SULFO-TAG anti-human IgG antibody (diluted 1:200) incubated for one hour at room  
359 temperature with shaking at 700rpm. 150 µl/well of MSD Gold Read Buffer B was then  
360 added to each plate immediately before reading on an MSD QuickPlex plate reader.

### 361 **Octet BLI analysis**

362 Octet biolayer interferometry (BLI) was performed using an Octet Red96 instrument  
363 (ForteBio, Inc.). A 5 µg/ml concentration of 002-S21F2 was captured on a protein A  
364 sensor and its binding kinetics were tested with serial 2-fold diluted RBD (600 nM to 37.5  
365 nM) and spike hexapro protein (100 nM to 6.25 nM). The baseline was obtained by  
366 measurements taken for 60 s in BLI buffer (1x PBS and 0.05% Tween-20), and then, the  
367 sensors were subjected to association phase immersion for 300 s in wells containing  
368 serial dilutions of RBD or trimeric spike hexapro protein. Then, the sensors were  
369 immersed in BLI buffer for as long as 600 s to measure the dissociation phase. The mean

370  $K_{on}$ ,  $K_{off}$  and apparent  $KD$  values of the mAbs binding affinities for RBD and spike hexaprotein  
371 were calculated from all the binding curves based on their global fit to a 1:1 Langmuir  
372 binding model using Octet software version 12.0.

### 373 **Spike protein expression and purification**

374 SARS-CoV-2 Spike-6P trimer protein carrying WA.1 and Omicron strain mutations were  
375 produced by transfecting FreeStyle 293-F cells using WA.1-spike-6P and Omicron-spike-  
376 6P DNA plasmids, respectively. There are two mismatched positions in our Omicron  
377 plasmid -1) position 213-216 in NTD is EPER instead of sequence REPE, 2) position 493  
378 is a lysine residue instead of an arginine. Transfections were performed as per the  
379 manufacturer's protocol (Thermo Fisher). Briefly, FreeStyle 293-F cells were seeded at a  
380 density of  $2 \times 10^6$  cells/ml in Expi293 expression medium and incubated at  $37^\circ\text{C}$  and 127  
381 rpm with 8%  $\text{CO}_2$  overnight. The next day,  $2.5 \times 10^6$  cells/ml were transfected using  
382 ExpiFectamine™ 293 transfection reagent (ThermoFisher, cat. no. A14524). The cells  
383 continued to grow for 4-5 days at  $37^\circ\text{C}$ , 127 rpm, 8%  $\text{CO}_2$  incubator. The cells were  
384 removed by centrifugation at  $4,000g$  for 20 minutes at room temperature and spike  
385 protein-containing supernatant was collected. The supernatant was filtered and loaded  
386 onto pre-washed His-Pur Ni-NTA resin for affinity purification. The Ni-NTA resin was  
387 incubated with a spike-trimer containing supernatant for 2 hours on a shaker at room  
388 temperature. Resin washed with wash Buffer containing 25mM Imidazole, 6.7mM  
389  $\text{NaH}_2\text{PO}_4 \cdot \text{H}_2\text{O}$  and 300mM NaCl in PBS followed by spike protein elution in elution buffer  
390 containing 235mM Imidazole, 6.7mM  $\text{NaH}_2\text{PO}_4 \cdot \text{H}_2\text{O}$  and 300mM NaCl in PBS. Eluted  
391 protein dialyzed against PBS and concentrated. The concentrated protein ran onto a  
392 Superose-6 Increase 10/300 column and protein eluted as trimeric spike collected. The  
393 quality of the protein was evaluated by SDS-PAGE and by Negative Stain-EM.

### 394 **Negative Stain – Electron Microscopy (NS-EM)**

395 Spike protein was diluted to 0.05mg/ml in PBS before grid preparation. A  $3\mu\text{L}$  drop of  
396 diluted protein was applied to previously glow-discharged, carbon-coated grids for  $\sim 60$   
397 sec, blotted and washed twice with water, stained with 0.75% uranyl formate, blotted  
398 and air-dried. Between 30-and 50 images were collected on a Talos L120C microscope  
399 (Thermo Fisher) at 73,000 magnification and  $1.97 \text{ \AA}$  pixel size. Relion-3.1 (30) or  
400 Cryosparc v3.3.2 (31) was used for particle picking, 2D classification.

## 401 **Sample preparation for cryoEM**

402 SARS-CoV-2 spike-6P trimer incubated with the mAb (full-length IgG) at 0.7 mg/ml  
403 concentration. The complex was prepared at a 0.4 sub-molar ratio of mAb to prevent  
404 inter-spike crosslinking, mediated by bi-valent binding of Fab in IgG. The complex was  
405 incubated at room temperature for ~5 min before vitrification. 3 $\mu$ L of the complex was  
406 applied onto a freshly glow-discharged (PLECO easiGLOW) 400 mesh, 1.2/1.3 C-Flat grid  
407 (Electron Microscopy Sciences). After 20 s of incubation, grids were blotted for 3 s at 0  
408 blot force and vitrified using a Vitrobot IV (Thermo Fisher Scientific) under 22°C with  
409 100% humidity.

## 410 **CryoEM data acquisition**

411 Single-particle cryoEM data for mAb 002-S21F2 in complex with WA.1 and Omicron  
412 spike-6p protein were collected on a 200 kV Talose Arctica transmission electron  
413 microscope (ThermoFisher Scientific) equipped with Gatan K3 direct electron detector  
414 behind 20 eV slit width energy filter. Multi-frame movies were collected at a pixel size of  
415 1.1 Å per pixel with a total dose of 51 e/ $\text{Å}^2$  at defocus range of -1.0 to -2.4  $\mu$ m.

## 416 **CryoEM data analysis and model building**

417 CryoEM movies were motion-corrected either in Motioncorr2 in Relion3.0 (30) or using  
418 Patch motion correction implemented in Cryosparc v3.3.1 (31). When Motion correction  
419 was performed outside of Cryosparc, motion-corrected micrographs were imported in  
420 Cryosparc v3.3.1 and corrected for contrast transfer function using Cryosparc's  
421 implementation of Patch CTF estimation. Micrographs with poor CTF fits were discarded  
422 using CTF fit resolution cutoff to ~6.0 Å. Particles were picked using a Blob picker,  
423 extracted and subjected to an iterative round of 2D classification. Particles belonging to  
424 the best 2D classes with secondary structure features were selected for heterogeneous  
425 3D refinement to separate IgG bound Spike particles from non-IgG bound Spike particles.  
426 Particles belonging to the best IgG bound 3D class were refined in non-uniform 3D  
427 refinement with per particle CTF and higher-order aberration correction turned on. To  
428 further improve the resolution of the RBD-IgG binding interface a soft mask was created  
429 covering one RBD and interacting Fab region of IgG and refined locally in Cryosparc using  
430 Local Refinement on signal subtracted particles. All maps were density modified in

431 Phenix (32) using Resolve CryoEM. The combined Focused Map tool in Phenix was used  
432 to integrate high resolution locally refined maps into an overall map. Additional data  
433 processing details are summarized in Figure **S5-S6**.

434 The initial spike models for WA.1 (PDB:7lrt) or Omicron (PDB:7tf8) as well as individual  
435 heavy and light chains of the Fab region of an IgG (generated with Alphafold (33)) were  
436 docked into cryoEM density maps using UCSF ChimeraX (34). The full Spike-mAb model  
437 was refined using rigid body refinement in Phenix, followed by refinement in Isolde (35).  
438 The final model was refined further in Phenix using real-space refinement. Glycans with  
439 visible density were modelled in Coot (36). Model validation was performed using  
440 Molprobit (37). PDBePISA (38) was used to identify mAb-RBD interface residue, to  
441 calculate buried surface area and to identify polar interaction. Figures were prepared in  
442 ChimeraX(34) and PyMOL (39).

#### 443 **References**

- 444 1. WHO, WHO Coronavirus (COVID-19) Dashboard., (2022).
- 445 2. D. Corti, L. A. Purcell, G. Snell, D. Veessler, Tackling COVID-19 with neutralizing  
446 monoclonal antibodies. *Cell* **184**, 3086-3108 (2021).
- 447 3. S. Kumar, A. Chandele, A. Sharma, Current status of therapeutic monoclonal  
448 antibodies against SARS-CoV-2. *PLoS Pathog* **17**, e1009885 (2021).
- 449 4. Y. Weisblum *et al.*, Escape from neutralizing antibodies by SARS-CoV-2 spike protein  
450 variants. *Elife* **9**, (2020).
- 451 5. V. C. Cheng *et al.*, Rapid spread of SARS-CoV-2 Omicron subvariant BA.2 in a single-  
452 source community outbreak. *Clin Infect Dis*, (2022).
- 453 6. V. V. Edara *et al.*, mRNA-1273 and BNT162b2 mRNA vaccines have reduced  
454 neutralizing activity against the SARS-CoV-2 omicron variant. *Cell Rep Med* **3**, 100529  
455 (2022).
- 456 7. L. A. VanBlargan *et al.*, An infectious SARS-CoV-2 B.1.1.529 Omicron virus escapes  
457 neutralization by therapeutic monoclonal antibodies. *Nat Med* **28**, 490-495 (2022).
- 458 8. D. Planas *et al.*, Considerable escape of SARS-CoV-2 Omicron to antibody  
459 neutralization. *Nature* **602**, 671-675 (2022).
- 460 9. S. Iketani *et al.*, Antibody evasion properties of SARS-CoV-2 Omicron sublineages.  
461 *Nature* **604**, 553-556 (2022).
- 462 10. A. C. Walls *et al.*, Structure, Function, and Antigenicity of the SARS-CoV-2 Spike  
463 Glycoprotein. *Cell* **181**, 281-292 e286 (2020).
- 464 11. K. M. Hastie *et al.*, Defining variant-resistant epitopes targeted by SARS-CoV-2  
465 antibodies: A global consortium study. *Science* **374**, 472-478 (2021).
- 466 12. C. O. Barnes *et al.*, SARS-CoV-2 neutralizing antibody structures inform therapeutic  
467 strategies. *Nature* **588**, 682-687 (2020).

- 468 13. M. Hoffmann *et al.*, The Omicron variant is highly resistant against antibody-mediated  
469 neutralization: Implications for control of the COVID-19 pandemic. *Cell* **185**, 447-456  
470 e411 (2022).
- 471 14. K. Nayak *et al.*, Characterization of neutralizing versus binding antibodies and memory  
472 B cells in COVID-19 recovered individuals from India. *Virology* **558**, 13-21 (2021).
- 473 15. B. Briney, A. Inderbitzin, C. Joyce, D. R. Burton, Commonality despite exceptional  
474 diversity in the baseline human antibody repertoire. *Nature* **566**, 393-397 (2019).
- 475 16. K. Westendorf *et al.*, LY-CoV1404 (bebtelovimab) potently neutralizes SARS-CoV-2  
476 variants. *bioRxiv*, (2022).
- 477 17. T. Zhou *et al.*, Structural basis for potent antibody neutralization of SARS-CoV-2  
478 variants including B.1.1.529. *Science* **376**, eabn8897 (2022).
- 479 18. M. McCallum *et al.*, Structural basis of SARS-CoV-2 Omicron immune evasion and  
480 receptor engagement. *Science* **375**, 864-868 (2022).
- 481 19. A. J. Greaney *et al.*, Mapping mutations to the SARS-CoV-2 RBD that escape binding  
482 by different classes of antibodies. *Nat Commun* **12**, 4196 (2021).
- 483 20. M. I. J. Raybould, A. Kovaltsuk, C. Marks, C. M. Deane, CoV-AbDab: the coronavirus  
484 antibody database. *Bioinformatics* **37**, 734-735 (2021).
- 485 21. J. G. Jardine *et al.*, HIV-1 broadly neutralizing antibody precursor B cells revealed by  
486 germline-targeting immunogen. *Science* **351**, 1458-1463 (2016).
- 487 22. J. M. Steichen *et al.*, HIV Vaccine Design to Target Germline Precursors of Glycan-  
488 Dependent Broadly Neutralizing Antibodies. *Immunity* **45**, 483-496 (2016).
- 489 23. J. M. Steichen *et al.*, A generalized HIV vaccine design strategy for priming of broadly  
490 neutralizing antibody responses. *Science* **366**, (2019).
- 491 24. M. S. Suthar *et al.*, Rapid Generation of Neutralizing Antibody Responses in COVID-19  
492 Patients. *Cell Rep Med* **1**, 100040 (2020).
- 493 25. C. W. Davis *et al.*, Longitudinal Analysis of the Human B Cell Response to Ebola Virus  
494 Infection. *Cell* **177**, 1566-1582 e1517 (2019).
- 495 26. J. C. Milligan *et al.*, Asymmetric and non-stoichiometric glycoprotein recognition by  
496 two distinct antibodies results in broad protection against ebolaviruses. *Cell* **185**, 995-  
497 1007 e1018 (2022).
- 498 27. M. P. Lefranc, IMGT, the international ImMunoGeneTics database. *Nucleic Acids Res*  
499 **31**, 307-310 (2003).
- 500 28. C. W. Tan *et al.*, A SARS-CoV-2 surrogate virus neutralization test based on antibody-  
501 mediated blockage of ACE2-spike protein-protein interaction. *Nat Biotechnol* **38**,  
502 1073-1078 (2020).
- 503 29. R. Valanparambil *et al.*, Antibody response to SARS-CoV-2 mRNA vaccine in lung  
504 cancer patients: Reactivity to vaccine antigen and variants of concern. *medRxiv*,  
505 (2022).
- 506 30. S. H. Scheres, RELION: implementation of a Bayesian approach to cryo-EM structure  
507 determination. *J Struct Biol* **180**, 519-530 (2012).
- 508 31. A. Punjani, J. L. Rubinstein, D. J. Fleet, M. A. Brubaker, cryoSPARC: algorithms for rapid  
509 unsupervised cryo-EM structure determination. *Nat Methods* **14**, 290-296 (2017).
- 510 32. P. D. Adams *et al.*, PHENIX: a comprehensive Python-based system for  
511 macromolecular structure solution. *Acta Crystallogr D Biol Crystallogr* **66**, 213-221  
512 (2010).
- 513 33. J. Jumper *et al.*, Highly accurate protein structure prediction with AlphaFold. *Nature*  
514 **596**, 583-589 (2021).



- 515 34. T. D. Goddard *et al.*, UCSF ChimeraX: Meeting modern challenges in visualization and  
516 analysis. *Protein Sci* **27**, 14-25 (2018).
- 517 35. T. I. Croll, ISOLDE: a physically realistic environment for model building into low-  
518 resolution electron-density maps. *Acta Crystallogr D Struct Biol* **74**, 519-530 (2018).
- 519 36. P. Emsley, B. Lohkamp, W. G. Scott, K. Cowtan, Features and development of Coot.  
520 *Acta Crystallogr D Biol Crystallogr* **66**, 486-501 (2010).
- 521 37. C. J. Williams *et al.*, MolProbity: More and better reference data for improved all-atom  
522 structure validation. *Protein Sci* **27**, 293-315 (2018).
- 523 38. E. Krissinel, K. Henrick, Inference of macromolecular assemblies from crystalline state.  
524 *J Mol Biol* **372**, 774-797 (2007).
- 525 39. R. E. Rigsby, A. B. Parker, Using the PyMOL application to reinforce visual  
526 understanding of protein structure. *Biochem Mol Biol Educ* **44**, 433-437 (2016).
- 527

528

**Fig. 1**

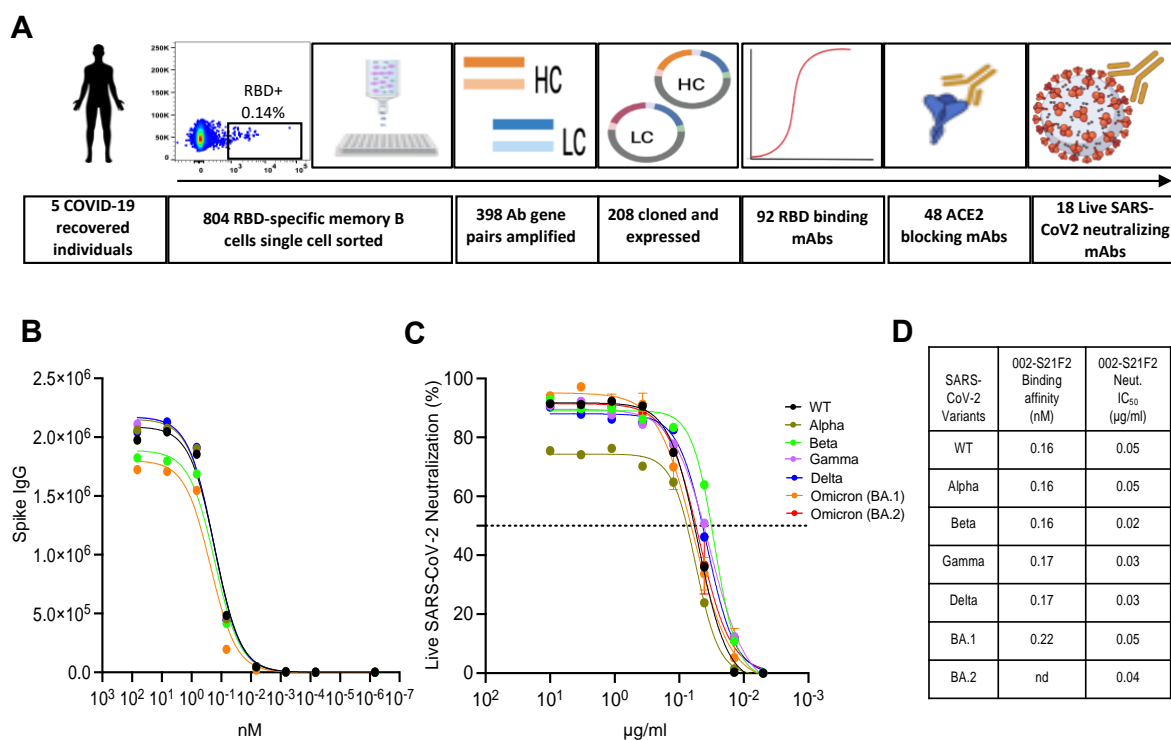

529

530 **Fig. 1. Identification of a broad and potent SARS-CoV-2 RBD specific human**  
 531 **monoclonal antibody 002-S21F2. (A)** The overall strategy for the isolation of RBD  
 532 specific mAbs described in this study. **(B)** 002-S21F2 was tested for binding to the spike  
 533 proteins of SARS-CoV-2 WA.1, Alpha, Beta, Gamma, Delta and Omicron variants of  
 534 concern (VOC). **(C)** Authentic live virus neutralization curves of 002-S21F2 for WA.1,  
 535 Alpha, Beta, Gamma, Delta and Omicron (BA.1 and BA.2) SARS-CoV-2 VOCs.  
 536 Neutralization was determined on Vero-TMPRSS2 cells using a focus reduction assay. **(D)**  
 537 002-S21F2 mediated neutralization 50% inhibitory concentration IC<sub>50</sub> values were  
 538 obtained from live SARS-CoV-2 VOC neutralization assays. Affinity constant (K<sub>D</sub>) values  
 539 calculated from the binding curves for two mAbs as measured by the MSD binding assays  
 540 are plotted.

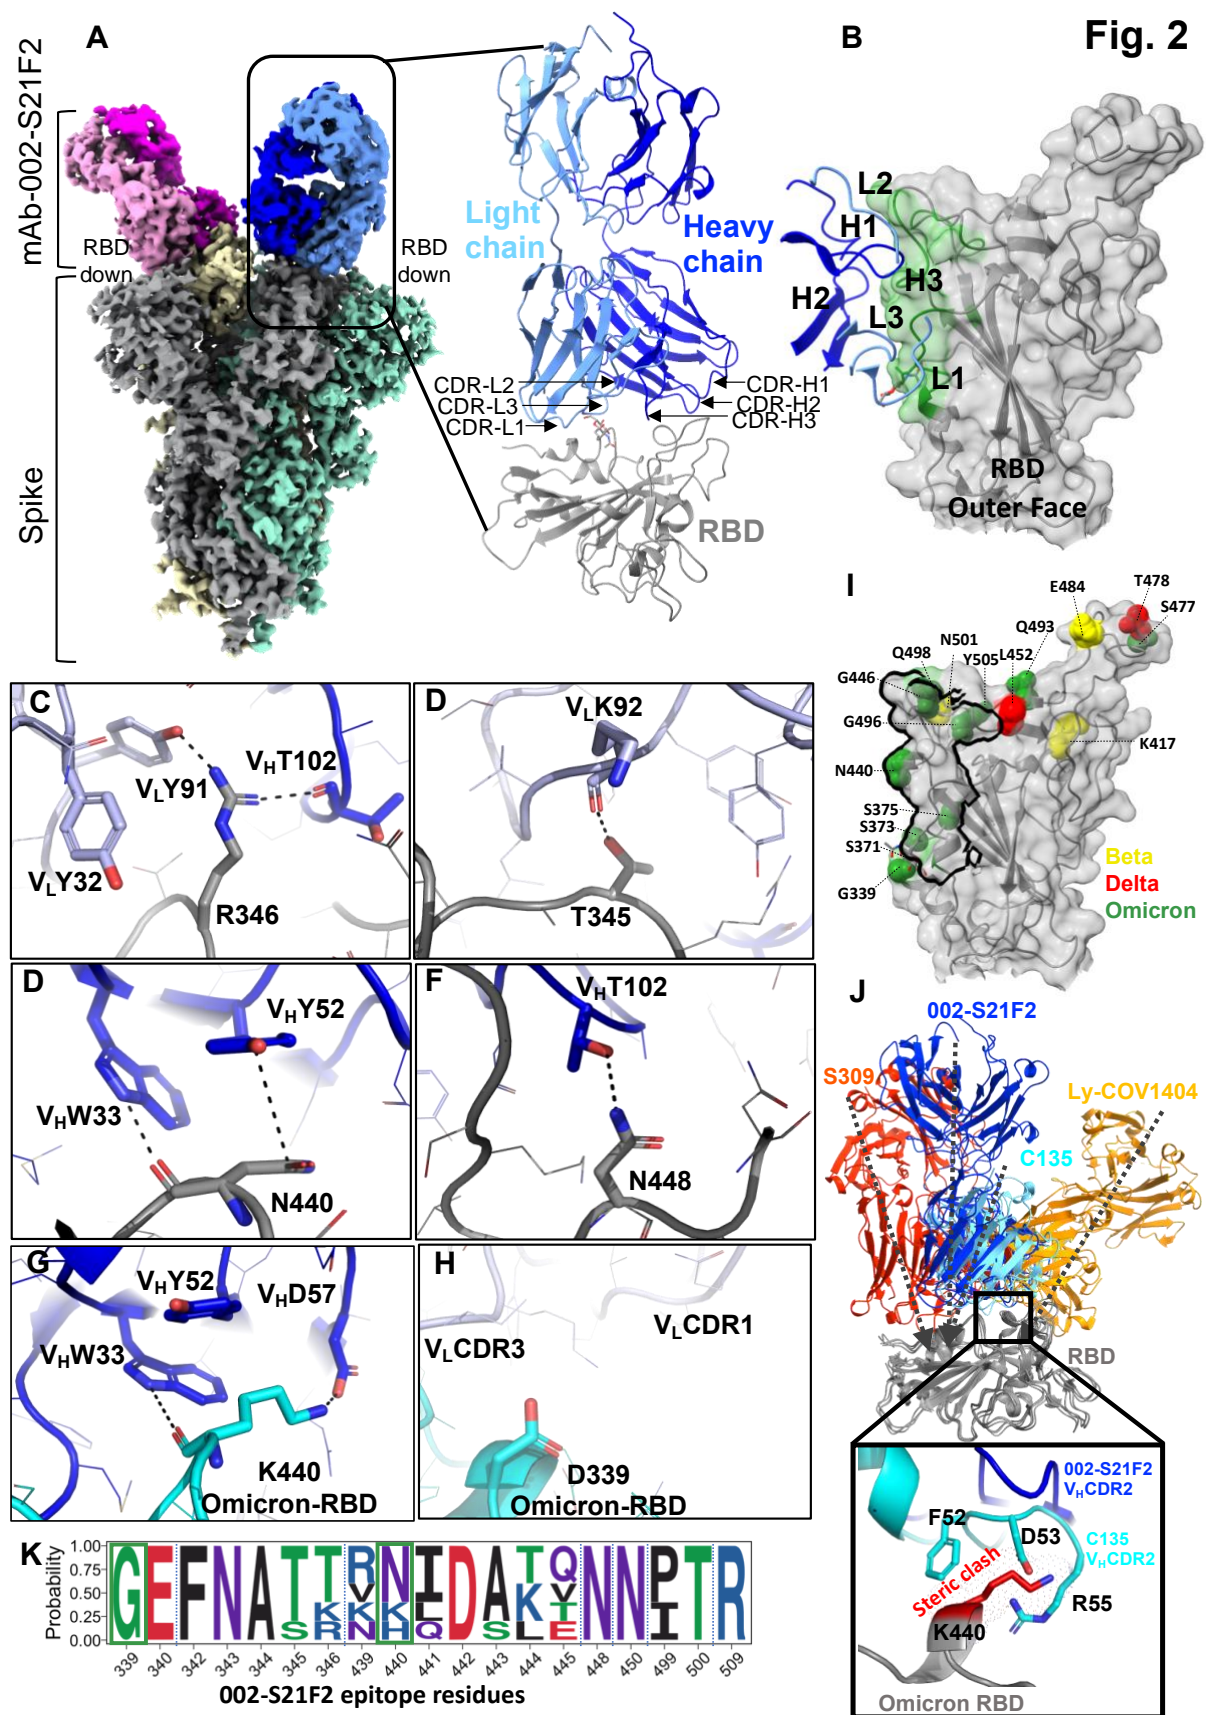

541

542 **Fig. 2. CryoEM structure of 002-S21F2 in complex with Spike trimer illustrates its**

543 **binding and neutralization of VOC. (A) CryoEM structure of WA.1 Spike-6P trimer in**

544 complex with mAb 002-S21F2. Overall density map at contour level of  $3.7 \sigma$  showing the  
545 antibody binding in all RBD “down” conformation. Each protomer of spike protein is  
546 shown in grey, yellow and green; the light and heavy chain of each FAB region are shown  
547 in blue/magenta and light blue/pink, respectively. The model for one of the Fab and RBD  
548 is shown in right, and the positions of all CDR regions are labelled. **(B)** Surface  
549 representation of RBD with relative positions of all CDR loops. The mapped epitope  
550 surface in RBD is highlighted in green. **(C-H)** Interaction details at 002-S21F2 and RBD  
551 binding interface, WA.1 **(C-F)** and Omicron **(G-H)**. **(I)** locations of Beta (yellow), Delta  
552 (red) and Omicron (green) mutations on RBD relative to the 002-S21F2 epitope site that  
553 is shown as a black outline. **(J)** Structural comparison of 002-S21F2 binding mode with  
554 other class-3 mAbs, S309, C135 and Ly-COV1404; arrow representing their angle of  
555 approach on RBD. Zoomed in view showing the steric clash of Omicron K440 mutation  
556 with CDR2 residues in mAb C135. **(K)** Sequence logo representing the sequence  
557 conservation of 002-S21F2 epitope. Residue position mutated in Omicron within 002-  
558 S21F2 epitope are boxed in green. Variant mutation positions are marked above.

**A**

**Fig. 3**

| RBD<br>Epitope | mAb Name          | Therapeutic name | Heavy Chain |                        | Light Chain |              |
|----------------|-------------------|------------------|-------------|------------------------|-------------|--------------|
|                |                   |                  | V-Gene      | CDRH3                  | V-Gene      | CDRL3        |
| Class 1        | <b>LY-CoV016</b>  | Etesevimab       | IGHV3-66    | ARVLPYGDYLDY           | IGKV1-39    | QQSYSTPPEYT  |
|                | <b>REGN10933</b>  | Casirivimab      | IGHV3-11    | ARDRGTTMVPFDY          | IGKV1-33    | QQYDNLPLT    |
|                | <b>COV2-2196</b>  | Tixagevimab      | IGHV1-58    | AAPYCSSISCNDGFDI       | IGKV3-20    | QHYGSSRGWT   |
|                | <b>P2C-1F11</b>   | Amubarvimab      | IGHV3-11    | ARDLVVYGMDV            | IGKV1-9     | QQYGSST      |
|                | <b>CT-P59</b>     | Regdanvimab      | IGHV2-70    | ARIPGFLRYRNRYYYYGMDV   | IGLV1-51    | GTWDSLSAGV   |
| Class 2        | <b>LY-CoV555</b>  | Bamlanivimab     | IGHV1-69    | ARGYYEARHYYYYYAMDV     | IGKV1-39    | QQSYSTPRT    |
| Class 3        | <b>REGN10987</b>  | Imdevimab        | IGHV3-30    | ASGSDYGDYLLVY          | IGLV2-14    | NSLTSISTWV   |
|                | <b>COV2-2130</b>  | Cilgavimab       | IGHV3-15    | TTAGSYYYDTVGPGLPEGKFDY | IGKV4-1     | QQYYSTLT     |
|                | <b>P2B-1G5</b>    | Romlusevimab     | IGHV7-4-1   | SSEITTLGGMDV           | IGLV3-21    | QVWDSISDHRV  |
|                | <b>S309</b>       | Sotrovimab       | IGHV1-18    | ARDYTRGAWFGESLIGGFDN   | IGKV3-20    | QQHDTSLT     |
|                | <b>LY-CoV1404</b> | Bebtelovimab     | IGHV2-5     | AHHSISTIFDH            | IGLV2-14    | SSYTTSSAV    |
| Class 4        | <b>002-S21F2</b>  | None             | IGHV5-51    | ARGEMTAVFGDY           | IGKV1-33    | QQYKILLTWT   |
|                | <b>ADG-2</b>      | Adintrevimab     | IGHV3-21    | ARDFSGHTAWAGTGFY       | IGLV1-40    | QSYDSSLSVLYT |

**B**

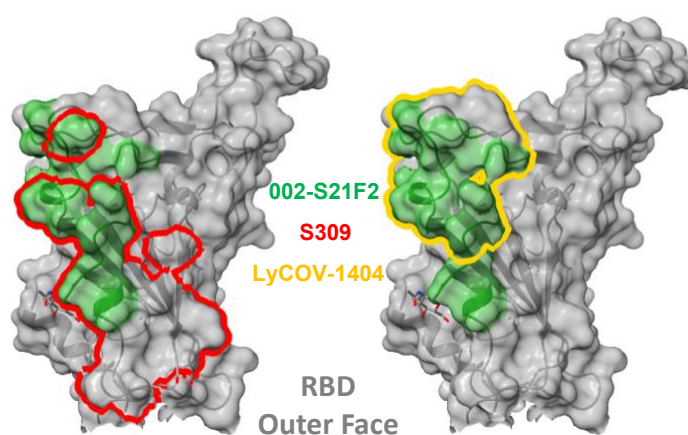

559  
560

561 **Fig. 3. Antibody 002-S21F2 exhibits distinct genetic and epitope contact features in**  
 562 **comparison to SARS-CoV-2 therapeutic antibodies. (A)** Comparison of 002-S21F2  
 563 mAb genetic feature with therapeutic mAbs in clinics. Omicron neutralizing mAbs are  
 564 highlighted in bold and red color **(B)** Comparison of 002-S21F2 (green) epitope site with  
 565 S309 (Sotrovimab) (red outline), Ly-CoV1404 (Bebtelovimab) (yellow outline) epitopes  
 566 on SARS-CoV-2 RBD.

567 **Supplementary Figures and Tables**

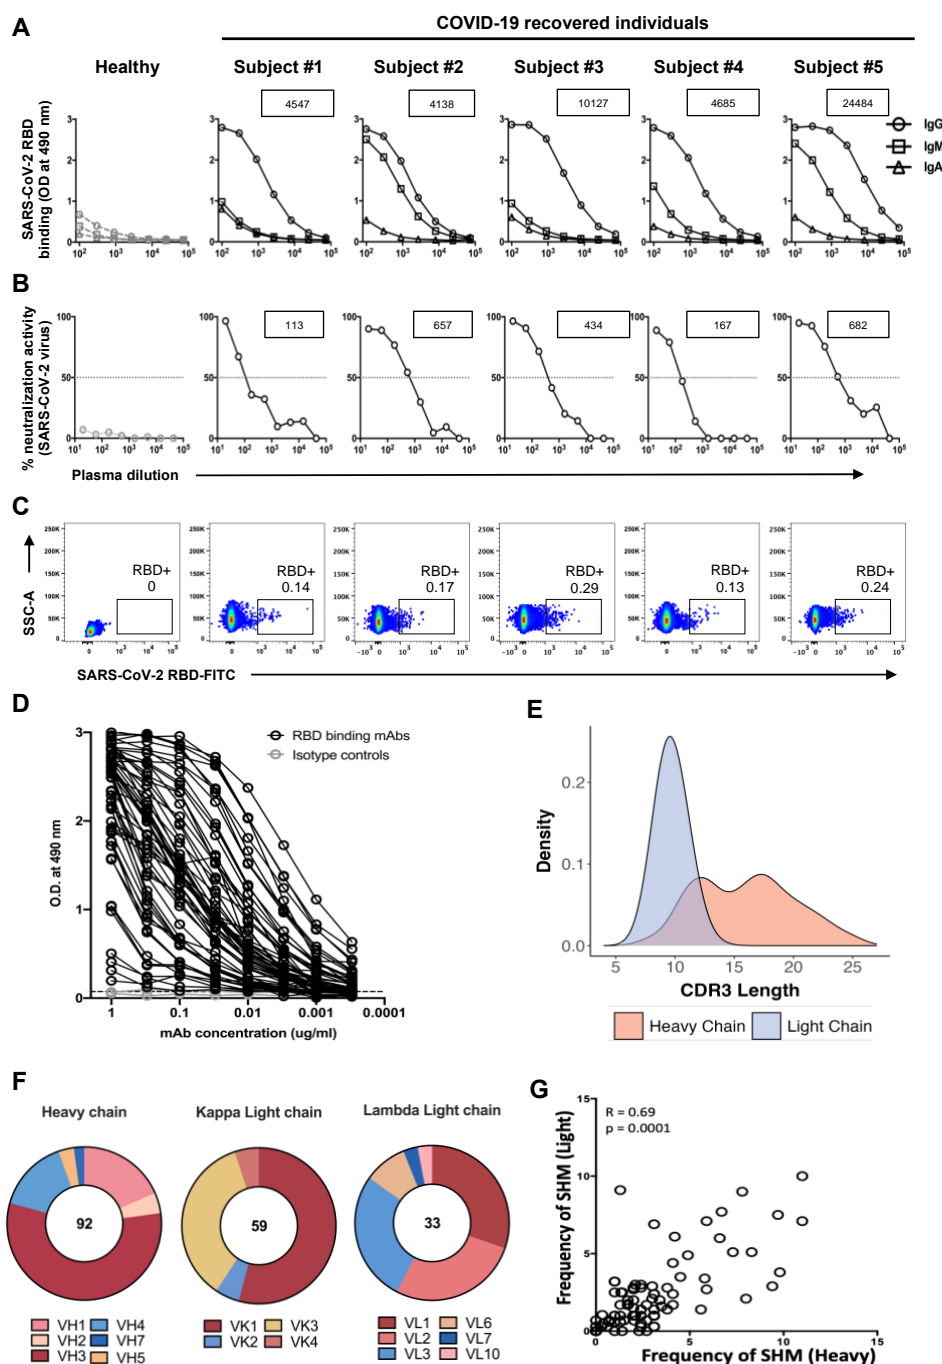

568

569 **Fig. S1: Isolation and characterization of 92 SARS-CoV-2 RBD specific mAbs. (A)**  
 570 ELISA curves showing plasma IgG, IgM and IgA reactivity against SARS-CoV-2 RBD  
 571 protein. The five subjects are COVID-19 recovered individuals recruited into a clinical  
 572 study during the first wave of the pandemic in India. ELISA results with the plasma of a  
 573 pre-pandemic healthy individual are shown for comparison. **(B)** Neutralization assay

574 curves showing activity against SARS-CoV-2 WA1/2020 strain and Delta (B.1.617.2)  
575 strain. The plasma dilution resulting in a 50% reduction in neutralization (FRNT-mNG<sub>50</sub>)  
576 is indicated by arrows. **(C)** Flow cytometry plots show SARS-CoV-2 RBD-specific memory  
577 B cells in the peripheral blood lymphocytes of select SARS-CoV-2 recovered individuals.  
578 The plots shown were gated on CD19 positive and CD3 negative populations. Staining  
579 was performed using FITC conjugated RBD protein. **(D)** ELISA curves showing SARS-CoV-  
580 2 RBD binding by each of the purified mAbs (n=92). **(E)** The CDR3 length of each sequence  
581 was calculated and their distribution was plotted as a histogram. **(F)** Donut plots showing  
582 the heavy chain, lambda light chain and kappa light chain gene distribution of the SARS-  
583 CoV-2 RBD-specific mAbs (n=92). **(G)** Correlation plot of heavy chain and light chain SHM  
584 (%). Pearson correlation coefficient (R) and p-value have been shown.

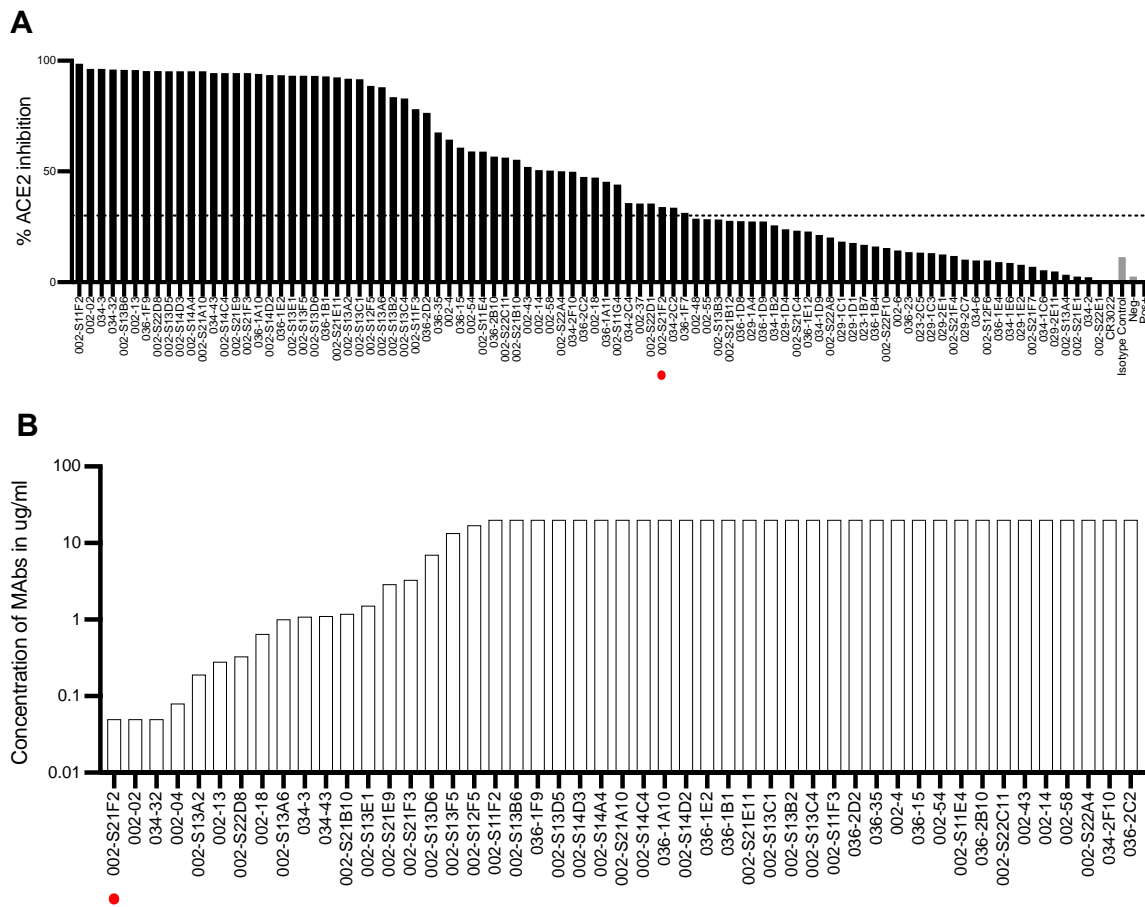

585

586 **Fig. S2: ACE2 inhibition and neutralization potential analysis of 92 SARS-CoV-2 RBD**  
587 **specific mAbs.** (A) ACE2 inhibition analysis of SARS-CoV-2 RBD specific human  
588 monoclonal antibodies (n=92) was performed using the cPass™ SARS-CoV-2 surrogate  
589 neutralization antibody detection kit (Genscript, USA). All mAbs were tested at 20 µg/ml.  
590 Percent (%) inhibition values are plotted as a bar diagram (Black colour). Here, CR3022,  
591 a SARS-CoV and SARS-CoV-2 specific mAb was used as a positive control, A5GK (an  
592 inhouse CHIKV specific mAb) and D2-DV (an inhouse DENV mAb) were used as negative  
593 isotype control mAbs. The dotted line of the 30% cut-off value shows the set threshold  
594 over which ACE2 inhibition is positive as per manufacturers' instructions. (B)  
595 Neutralization: titers (FRNT-mNG<sub>50</sub>) against SARS-CoV-2 live virus (strain (WA.1/2020) of  
596 the few RBD binding mAbs. Here, mAb 002-S21F2 is marked with a red dot.



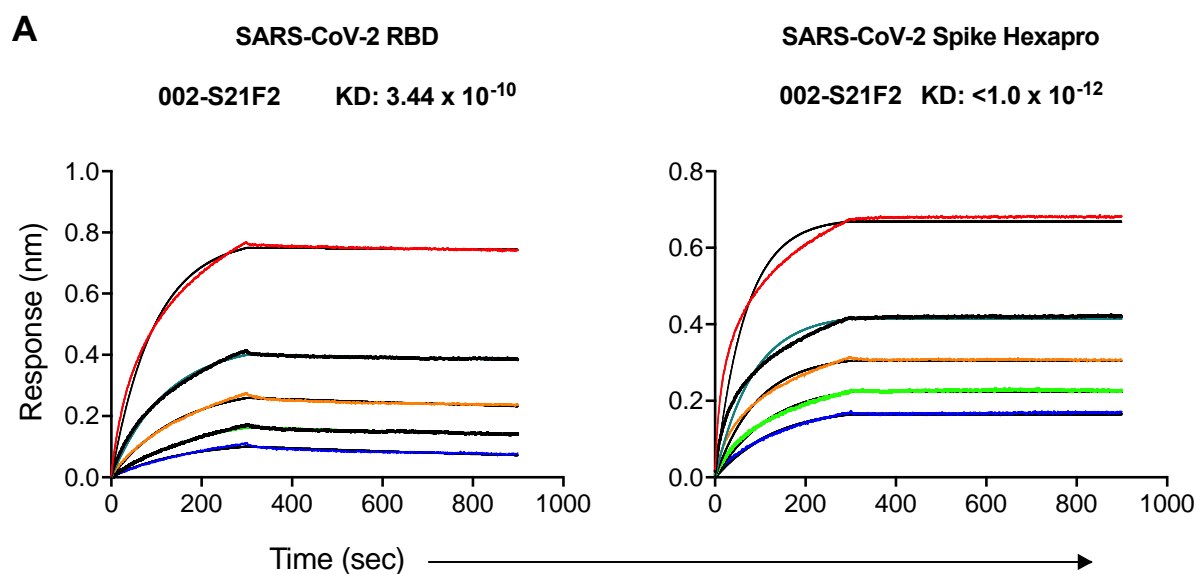

**B**

| mAb       | SARS-CoV-2 WT RBD |                        |                        | SARS-CoV-2 WT Spike hexapro |                        |                        |
|-----------|-------------------|------------------------|------------------------|-----------------------------|------------------------|------------------------|
|           | KD (M)            | K <sub>on</sub> (1/Ms) | K <sub>off</sub> (1/s) | KD (M)                      | K <sub>on</sub> (1/Ms) | K <sub>off</sub> (1/s) |
| 002-S21F2 | 3.44E-10          | 5.44E+05               | 2.18E-04               | <1.0E-12                    | 8.05E+05               | <1.0E-07               |

597

598

599

600 **Fig. S3: Antibody 002-S21F2 showed high affinity to SARS-CoV-2 RBD and spike**  
 601 **proteins in biolayer interferometry assays. (A)** Octet BLI sensorgrams showing the  
 602 SARS-CoV-2 RBD and Spike-6p binding affinities of the mAb 002-S21F2. In these assays,  
 603 002-S21F2 mAb (5 ug/ml concentration) was captured on protein A sensors and its  
 604 binding kinetics were tested with serial 2-fold diluted RBD (600 nM to 37.5 nM) and Spike  
 605 hexapro protein (100 nM to 6.25 nM). Association was measured for 300 seconds  
 606 followed by dissociation measurement for 600 seconds. **(B)** Describing the KD (M), K<sub>on</sub>  
 607 (1/Ms) and K<sub>off</sub> (1/s) values of the four potent mAbs with RBD and Spike hexapro  
 608 proteins.

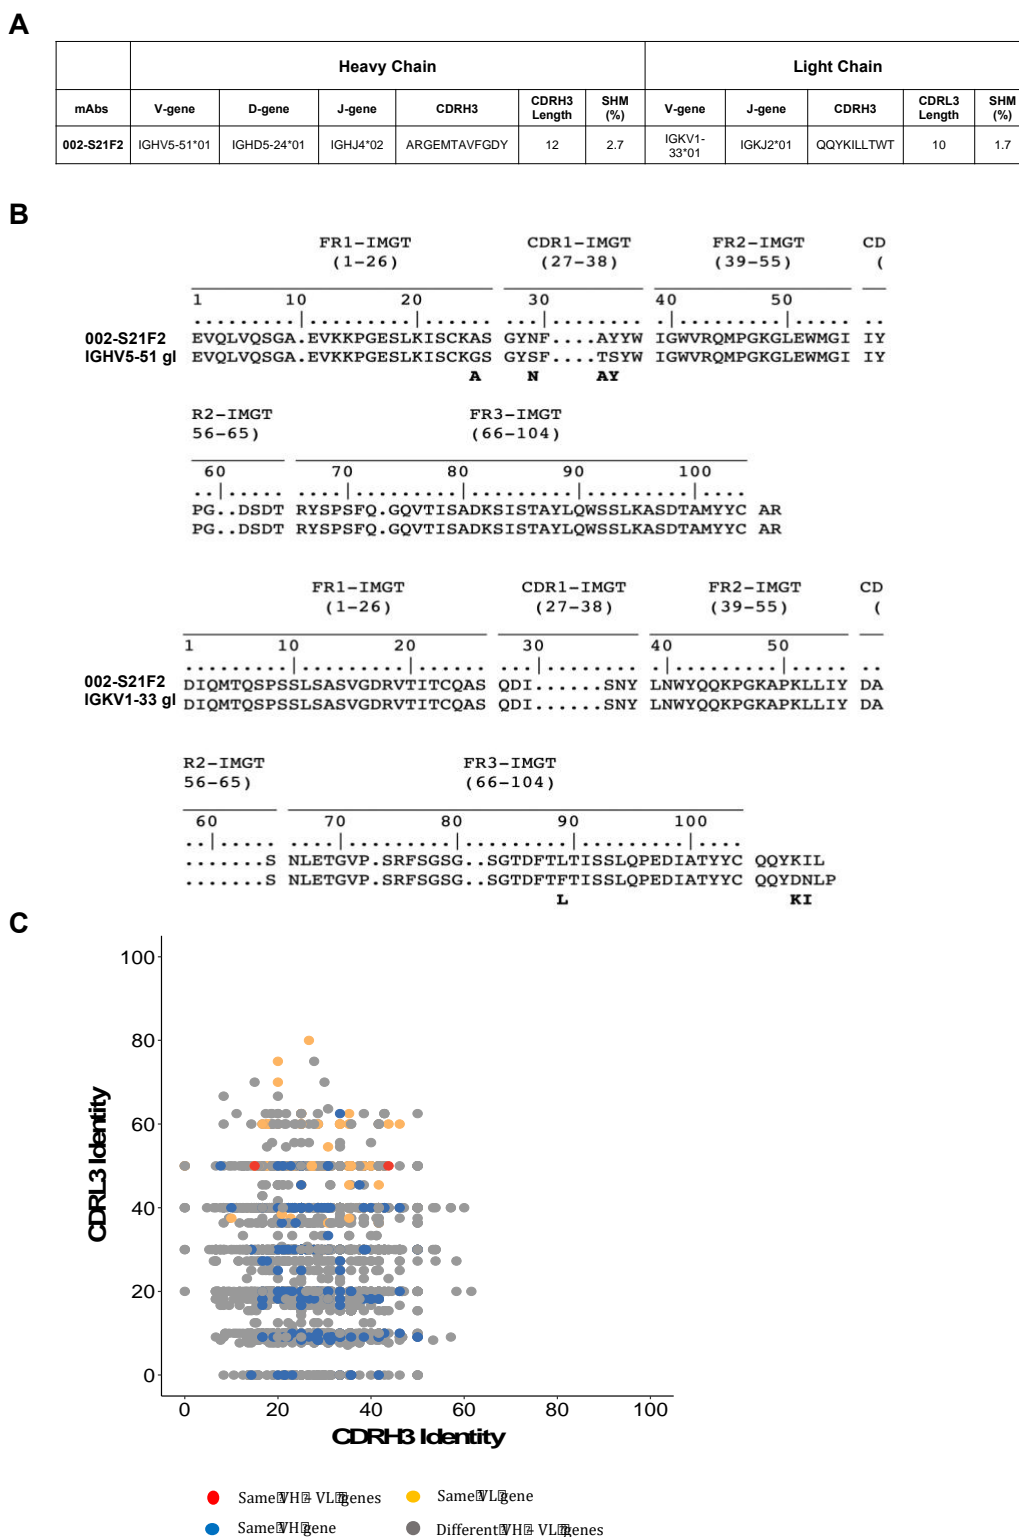

609

610 **Fig. S4. SARS-CoV-2 RBD specific bnAb 002-S21F2 exhibits a rare immunogenetic**  
 611 **make-up. (A)** Table showing the antibody heavy chain (HC) and light chain (LC) genetic  
 612 information of the 002-S21F2 bnAb. **(B)** IMGT V-quest alignment analysis result of 002-  
 613 S21F2 HC and LC gl with their respective germline sequence. Here, somatic mutations

614 are marked as bold amino acids in black color. **(C)** CDRH3 amino acid sequence identity  
615 to 002-S21F2 is plotted against CDRL3 amino acid identity to 002-S21F2 for paired HC  
616 and LC sequences of SARS-CoV-2 mAbs banked in the CoV-AbDab database. SARS-CoV-2  
617 mAbs with the same HC and LC germline gene as 002-S21F2 (IGHV5-51 and IGKV1-33)  
618 are shown in red color. MAbs using the same HC gene but different LC gene as 002-S21F2  
619 are shown in blue color. MAbs using different HC genes but the same LC gene as 002-  
620 S21F2 are shown in orange color. MAbs using a different HC and LC combination as 002-  
621 S21F2 are shown in grey color.

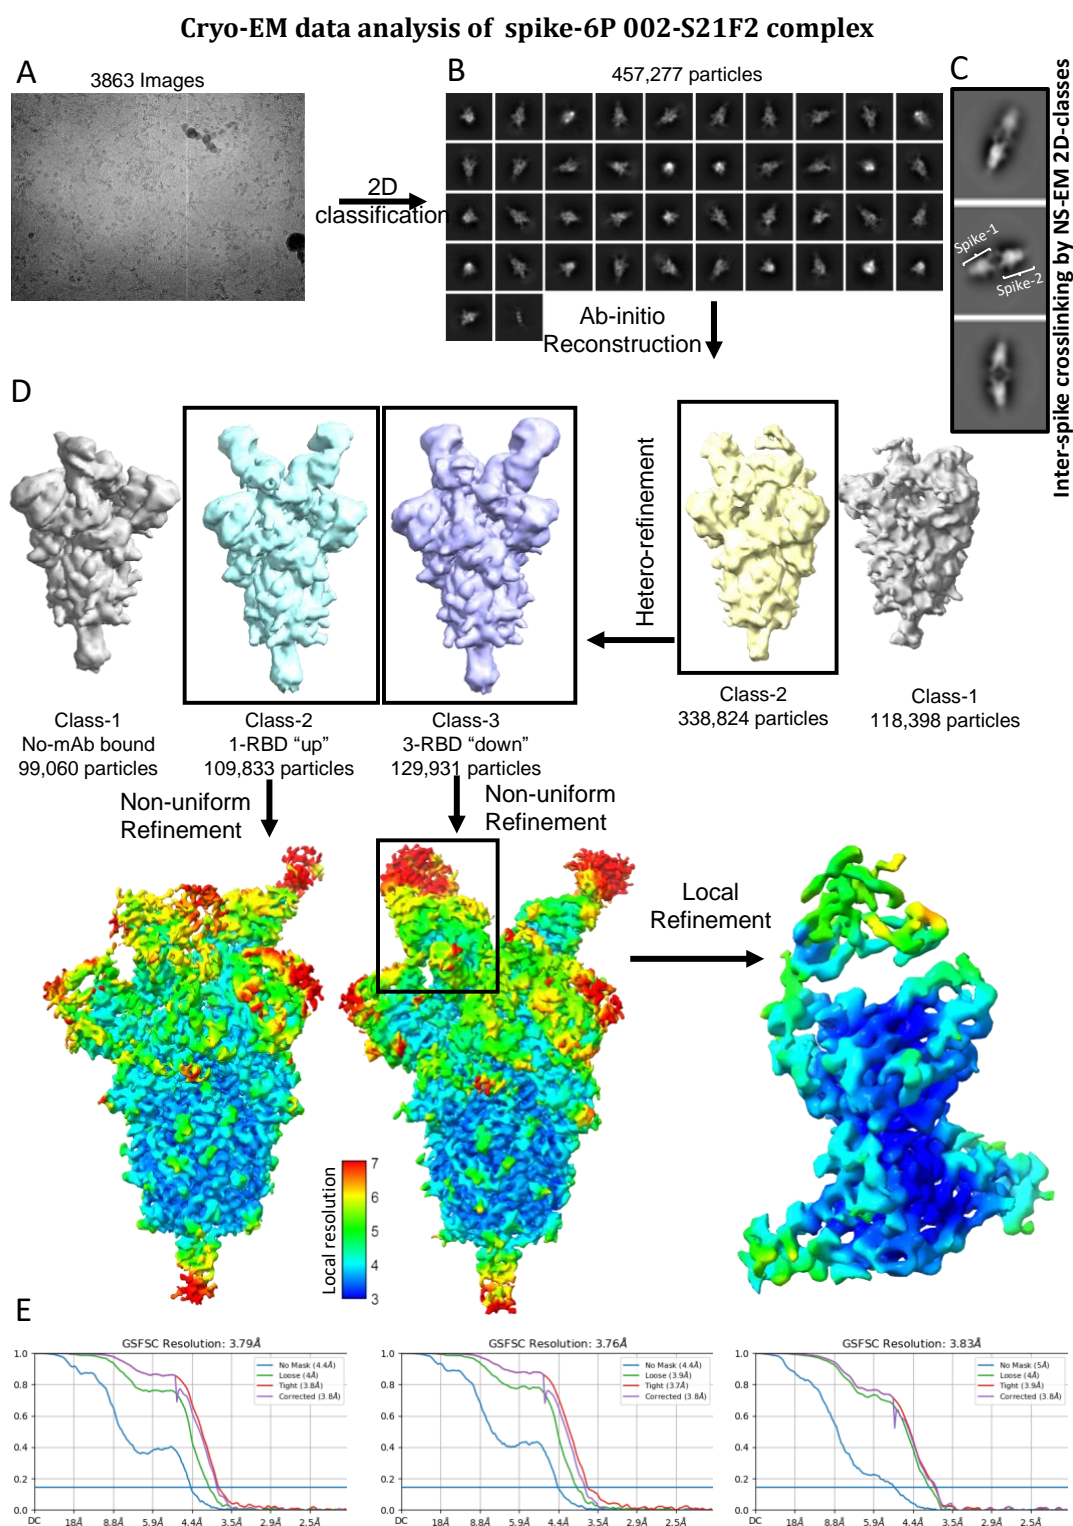

622

623

624 **Fig. S5. CryoEM data analysis and validation for WA.1 Spike-6P 002-S21F2 complex.**

625 **(A)** Representative electron micrograph. **(B)** Representative 2D-class averages. **(C)** The  
 626 2D-Classes derived from Negative Stain EM (NS-EM) data of WA.1 Spike-6P and 002-  
 627 S21F2 complex at saturating IgG concentration show head-to-head spike dimer. **(D)**

628 Classification scheme and refinement that yielded final cryoEM map reconstruction.  
629 Boxed classes were selected for further processing and refinement. The boxed region  
630 contains one RBD complexed with one Fab in a refined map masked for local refinement.  
631 **(E)** Gold standard Fourier shell correlation curve of final overall (two left panels) and  
632 locally refined (right panel) maps and resolution estimation based on 0.143 Fourier shell  
633 correlation criteria as indicated by a blue line.

### Cryo-EM data analysis of Omicron spike-6P 002-S21F2 complex

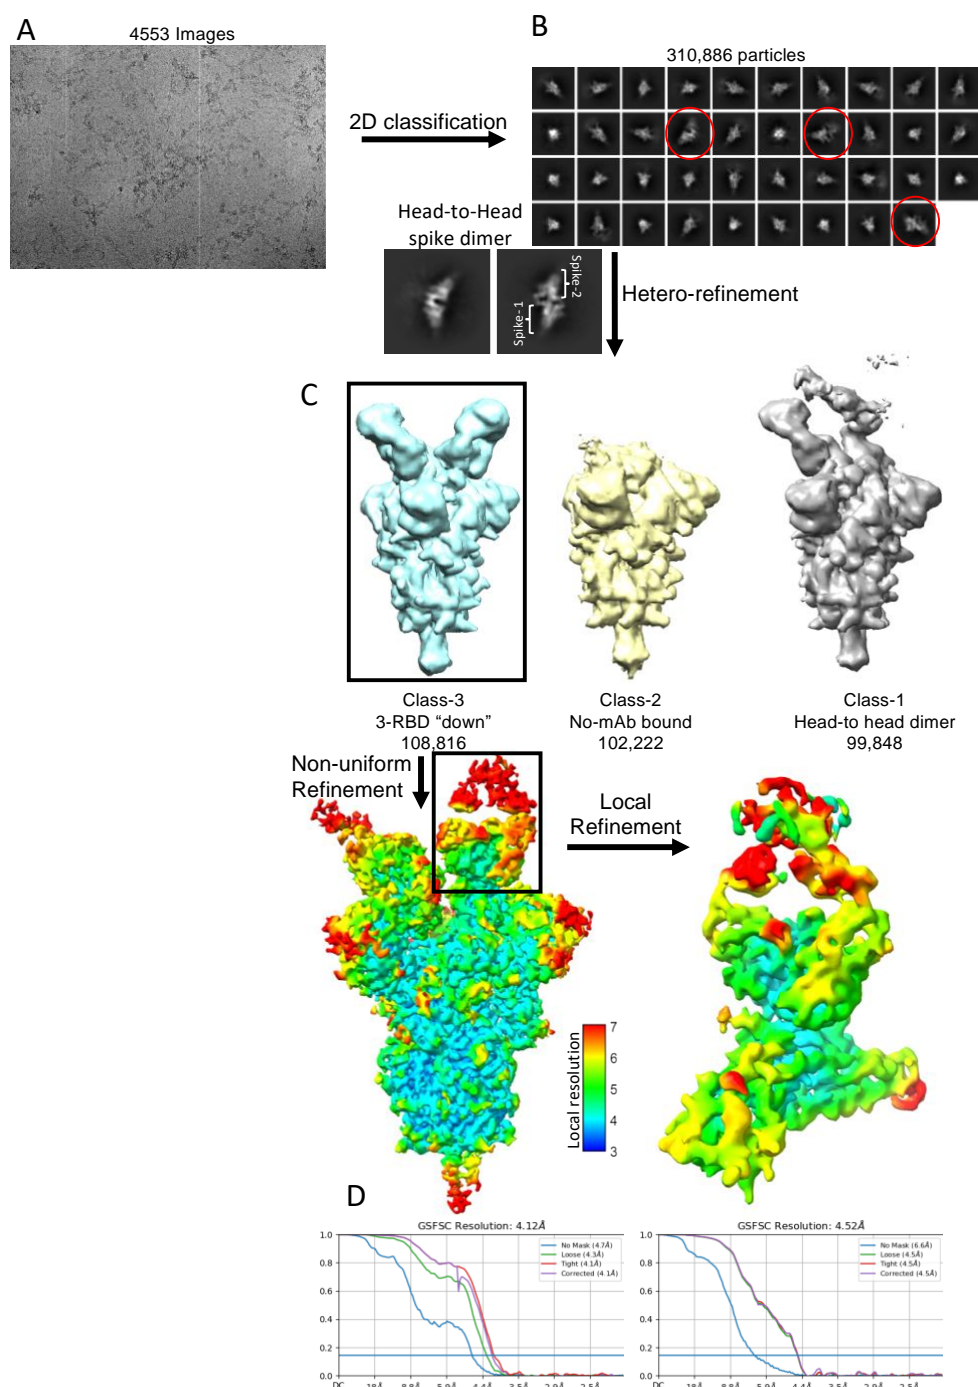

634

635 **Fig. S6. Cryo-EM data analysis and validation for Omicron Spike-6P and 002-S21F2**

636 **complex. (A)** Representative electron micrograph. **(B)** Representative 2D-class

637 averages. 2D classes showing head-to-head spike dimer are circled in red and shown

638 below. **(C)** Classification scheme and refinement that yielded final cryo-EM map

639 reconstruction. Boxed classes were selected for further processing and refinement.

640 Boxed region containing one RBD complexed with one Fab in refined map masked for

641 local refinement. **(D)** Gold standard Fourier shell correlation (FSC) curve of final overall

642 (left) and locally refined (right) maps and resolution estimation based on 0.143 Fourier  
643 shell correlation criteria as indicated by a blue line.

644

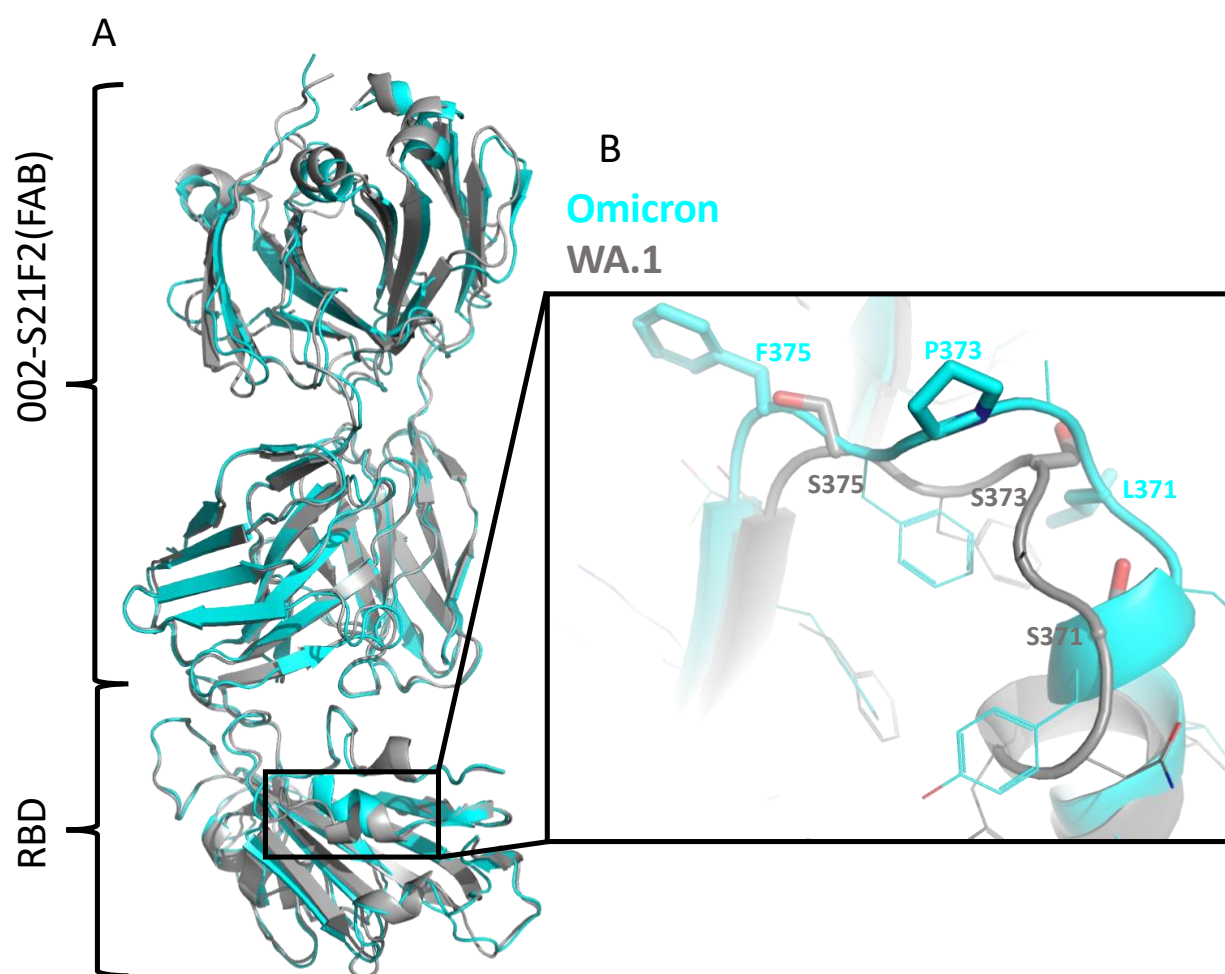

645

646 **Fig. S7. Structural comparison of WA.1 (grey) and Omicron (cyan) spike-002-S21F2**

647 **mAb complex. (A) Overall structural alignment of RBD and Fab region of 002-S21F2 in**

648 **WA.1 and Omicron complex structures. (B) Zoomed in view showing the local**

649 **conformation change in the specified region of RBD in WA.1 vs Omicron.**



| SARS-CoV-2 variants |           | RBD mutations |       |          |       |       |       |       |       |          |       |       |           |       |       |            |       |       |       |       |       |       |       |  |
|---------------------|-----------|---------------|-------|----------|-------|-------|-------|-------|-------|----------|-------|-------|-----------|-------|-------|------------|-------|-------|-------|-------|-------|-------|-------|--|
|                     |           | G339D         | R346K | S371L /F | S373P | S375F | T376A | D405N | R408S | K417N /T | N440K | G446S | L452R/Q/M | S477N | T478K | E484K /Q/A | F486V | F490S | Q493R | G496S | Q498R | N501Y | Y505H |  |
| Alpha               | B.1.1.7   |               |       |          |       |       |       |       |       |          |       |       |           |       |       |            |       |       |       |       |       |       |       |  |
| Beta                | B.1.351   |               |       |          |       |       |       |       | N     |          |       |       |           |       |       | K          |       |       |       |       |       |       |       |  |
| Gamma               | P.1       |               |       |          |       |       |       |       | T     |          |       |       |           |       |       | K          |       |       |       |       |       |       |       |  |
| Delta               | B.1.617.2 |               |       |          |       |       |       |       |       |          |       | R     |           |       |       |            |       |       |       |       |       |       |       |  |
| Epsilon             | B.1.427/9 |               |       |          |       |       |       |       |       |          |       | R     |           |       |       |            |       |       |       |       |       |       |       |  |
| Zeta                | P.2       |               |       |          |       |       |       |       |       |          |       |       |           |       |       | K          |       |       |       |       |       |       |       |  |
| Eta                 | B.1.525   |               |       |          |       |       |       |       |       |          |       |       |           |       |       | K          |       |       |       |       |       |       |       |  |
| Theta               | P.3       |               |       |          |       |       |       |       |       |          |       |       |           |       |       | K          |       |       |       |       |       |       |       |  |
| Iota                | B.1.526   |               |       |          |       |       |       |       |       |          |       |       |           |       |       | K          |       |       |       |       |       |       |       |  |
| Kappa               | B.1.617.1 |               |       |          |       |       |       |       |       |          |       | R     |           |       |       | Q          |       |       |       |       |       |       |       |  |
| Lambda              | C.37      |               |       |          |       |       |       |       |       |          |       | Q     |           |       |       |            |       |       |       |       |       |       |       |  |
| Mu                  | B.1.621   |               |       |          |       |       |       |       |       |          |       |       |           |       |       | K          |       |       |       |       |       |       |       |  |
| Omicron             | B.1.1.529 |               |       | L        |       |       |       |       |       |          |       |       |           |       |       | A          |       |       |       |       |       |       |       |  |
|                     | BA.1.1    |               |       | L        |       |       |       |       |       |          |       |       |           |       |       | A          |       |       |       |       |       |       |       |  |
|                     | BA.2      |               |       | F        |       |       |       |       |       |          |       |       |           |       |       | A          |       |       |       |       |       |       |       |  |
|                     | BA.2.13   |               |       | F        |       |       |       |       |       |          |       |       | M         |       |       | A          |       |       |       |       |       |       |       |  |
|                     | BA.2.12.1 |               |       | F        |       |       |       |       |       |          |       |       | Q         |       |       | A          |       |       |       |       |       |       |       |  |
|                     | BA.3      |               |       | F        |       |       |       |       |       |          |       |       |           |       |       | A          |       |       |       |       |       |       |       |  |
|                     | BA.4/BA.5 |               |       | F        |       |       |       |       |       |          |       |       | R         |       | A     |            |       |       |       |       |       |       |       |  |

650

651

652

653

**Fig. S8. Represents the SARS-CoV-2 RBD mutations reported in key variants. The**

654

002-S21F2 epitope residues are highlighted in orange on RBD mutations. Green color

655

highlighted boxes show the presence of RBD mutations in each SARS-CoV-2 variant.

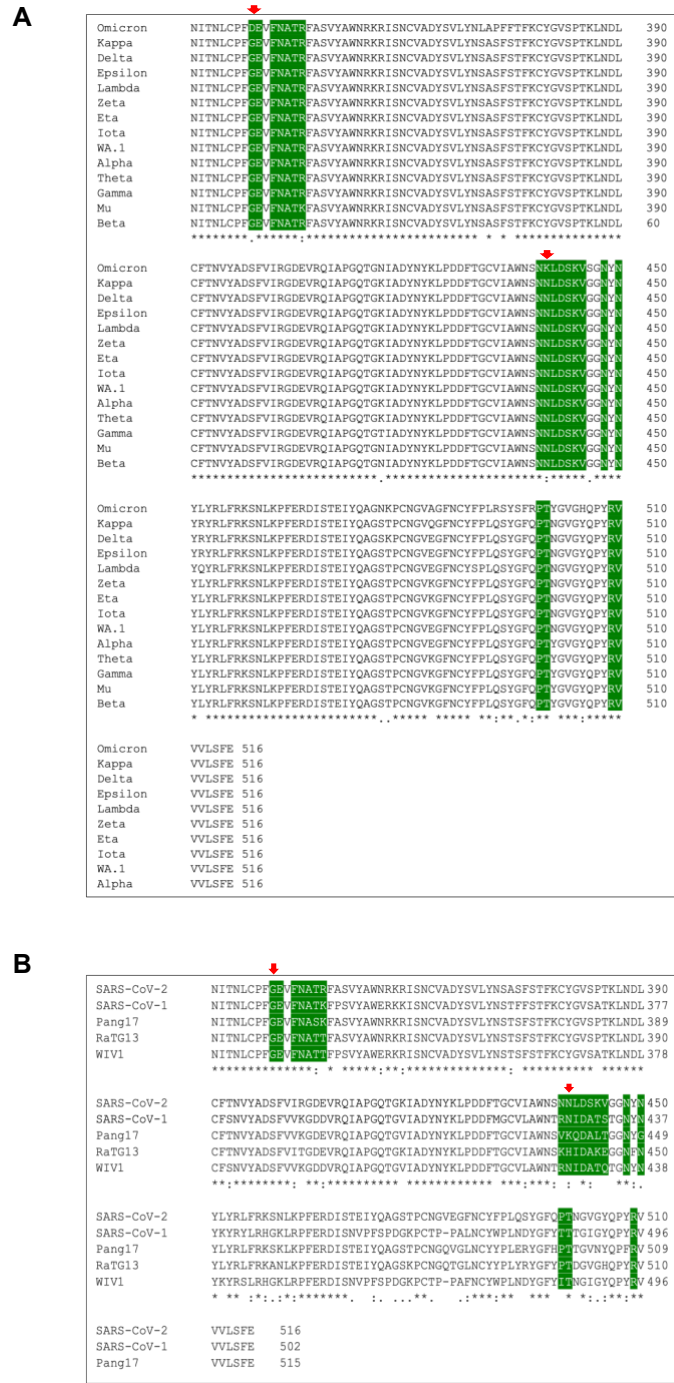

656

657 **Fig. S9. Sequence alignment of spike RBD. (A)** from most VOC and **(B)** from different  
 658 Sarbecoviruses used to derive the epitope logo. 002-S21F2 epitope residues are  
 659 highlighted in green, residue. Residue positions within the 002-S21F2 epitope that are  
 660 mutated in Omicron are shown as a red arrow.

**Table S1: Time points chosen post initial COVID-19 diagnosis for memory B cell characterization**

| <b>Subject #</b> | <b>Gender</b> | <b>Age</b> | <b>Days post initial SARS-CoV-2 RT-PCR diagnosis (in days)</b> |
|------------------|---------------|------------|----------------------------------------------------------------|
| 1                | M             | 35         | 51                                                             |
| 2                | M             | 49         | 45                                                             |
| 3                | M             | 52         | 56                                                             |
| 4                | M             | 44         | 42                                                             |
| 5                | M             | 49         | 25                                                             |

661  
662

**Table S2: CryoEM data collection**

| <b>Spike-mAb</b>                                          | <b>002-S21F2<br/>WA.1</b> | <b>002-S21F2-<br/>Omicron</b> |
|-----------------------------------------------------------|---------------------------|-------------------------------|
| EMDB                                                      | EMD-26262                 | EMD-26669                     |
| Microscope                                                | Talos Arctica             | Talos Arctica                 |
| Voltage (kV)                                              | 200                       | 200                           |
| Detector                                                  | Gatan K3                  | Gatan K3                      |
| Magnification (nominal)                                   | 79000                     | 79000                         |
| Energy filter slit width (eV)                             | 20                        | 20                            |
| Calibrated pixel size (Å/pix)                             | 1.1                       | 1.1                           |
| Exposure rate (e <sup>-</sup> /Å <sup>2</sup> /sec)       | 12.75                     | 12.75                         |
| Frames per exposure                                       | 48                        | 48                            |
| Total electron exposure (e <sup>-</sup> /Å <sup>2</sup> ) | 51                        | 51                            |
| Exposure per frame (e <sup>-</sup> /Å <sup>2</sup> )      | 1.0625                    | 1.0625                        |
| Defocus range (µm)                                        | 1-2.4                     | 1-2.4                         |
| Automation software                                       | EPU                       | EPU                           |
| # of Micrographs used                                     | 3863                      | 4553                          |
| Particles extracted                                       | 2,249,333                 | 2,553,301                     |
| Particles after 2D classification                         | 457,277                   | 310,886                       |
| Total # of refined particles                              | 129,931                   | 108,816                       |
| Symmetry imposed                                          | C1                        | C1                            |
| Map sharpening B-factor                                   | 148.8                     | 167.6                         |
| Unmasked Resolution at 0.5/0.143 FSC (Å)                  | 8.0/4.0                   | 8.7/4.7                       |
| Masked resolution at 0.5/0.143 FSC (Å)                    | 4.2/3.8                   | 4.5/4.1                       |

**Table S3: Model refinement and validation statistics**

| PDB                  | 7U0P          | 7UPL          |
|----------------------|---------------|---------------|
| Composition          |               |               |
| Amino acids          | <b>4102</b>   | <b>4031</b>   |
| Glycans              | <b>32</b>     | <b>54</b>     |
| RMSD bonds (Å)       | <b>0.004</b>  | <b>0.004</b>  |
| RMSD angles (°)      | <b>0.605</b>  | <b>0.65</b>   |
| Mean B-factors       |               |               |
| Amino acids          | <b>102.42</b> | <b>140.31</b> |
| Glycans              | <b>135.35</b> | <b>189.47</b> |
| Ramachandran         |               |               |
| Favored (%)          | <b>96.43</b>  | <b>93.55</b>  |
| Allowed (%)          | <b>3.57</b>   | <b>6.42</b>   |
| Outliers (%)         | <b>0.0</b>    | <b>0.0</b>    |
| Rotamer outliers (%) | <b>0.39</b>   | <b>0.0</b>    |
| Clash score          | <b>5.24</b>   | <b>7.1</b>    |
| C-beta outliers (%)  | <b>0.00</b>   | <b>0.0</b>    |
| CaBLAM outliers (%)  | <b>2.93</b>   | <b>3.6</b>    |
| CC (mask)            | <b>0.71</b>   | <b>0.74</b>   |
| CC (volume)          | <b>0.69</b>   | <b>0.73</b>   |
| MolProbity score     | <b>1.52</b>   | <b>1.81</b>   |
